# Supplementary material for: A systematic approach for product modelling and function integration to support adaptive redesign of product variants
Source: Springer Nature journal article supplement (doi:10.1007/s00163-022-00401-3), 2022-11-10
Supplement: MOESM1 [file 23700452]

Foo Shing Wong

David C. Wynn

---

Supplementary material for the journal  
article: A systematic approach for product  
modelling and function integration to  
support adaptive redesign of product  
variants

September 2022

## Supplementary material for the pen case study

Page 3: Exploded view of the basic pen

Page 4: Exploded view of the retracting pen

Page 5: Exploded view of the new pen variant

*Please note: All drawings are approximate for the purpose of illustrating the modelling approaches presented in this research paper.*

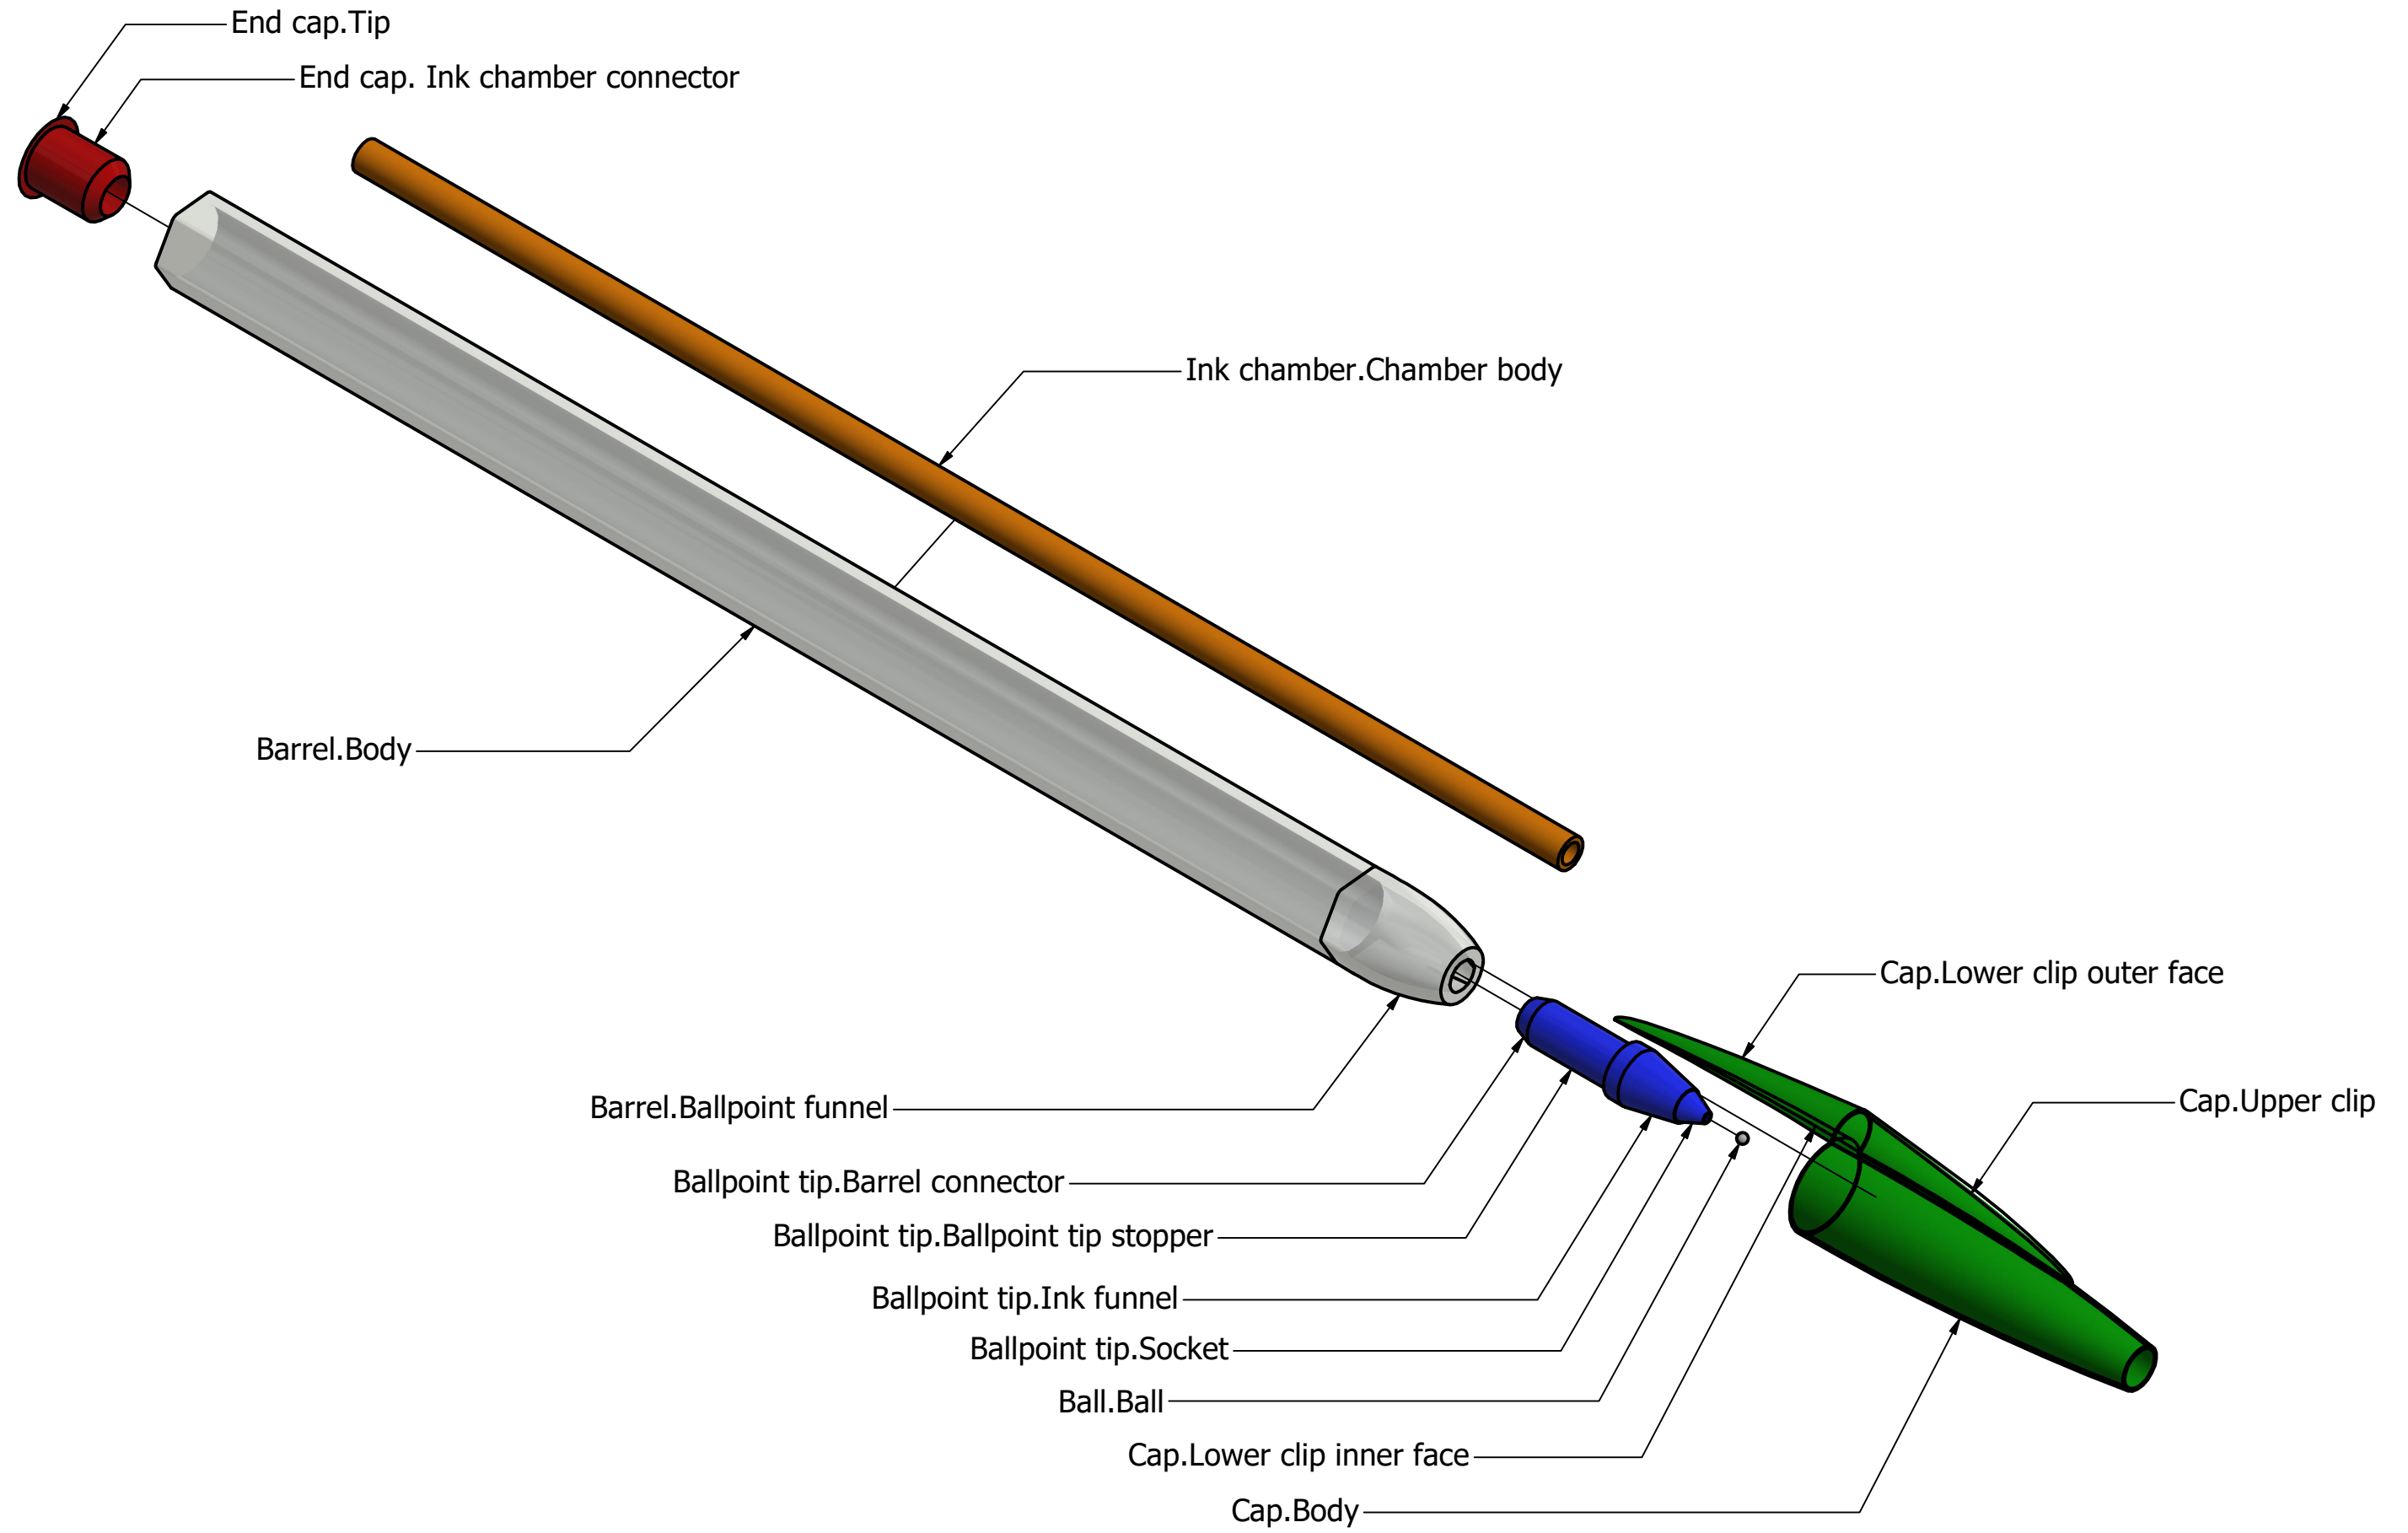

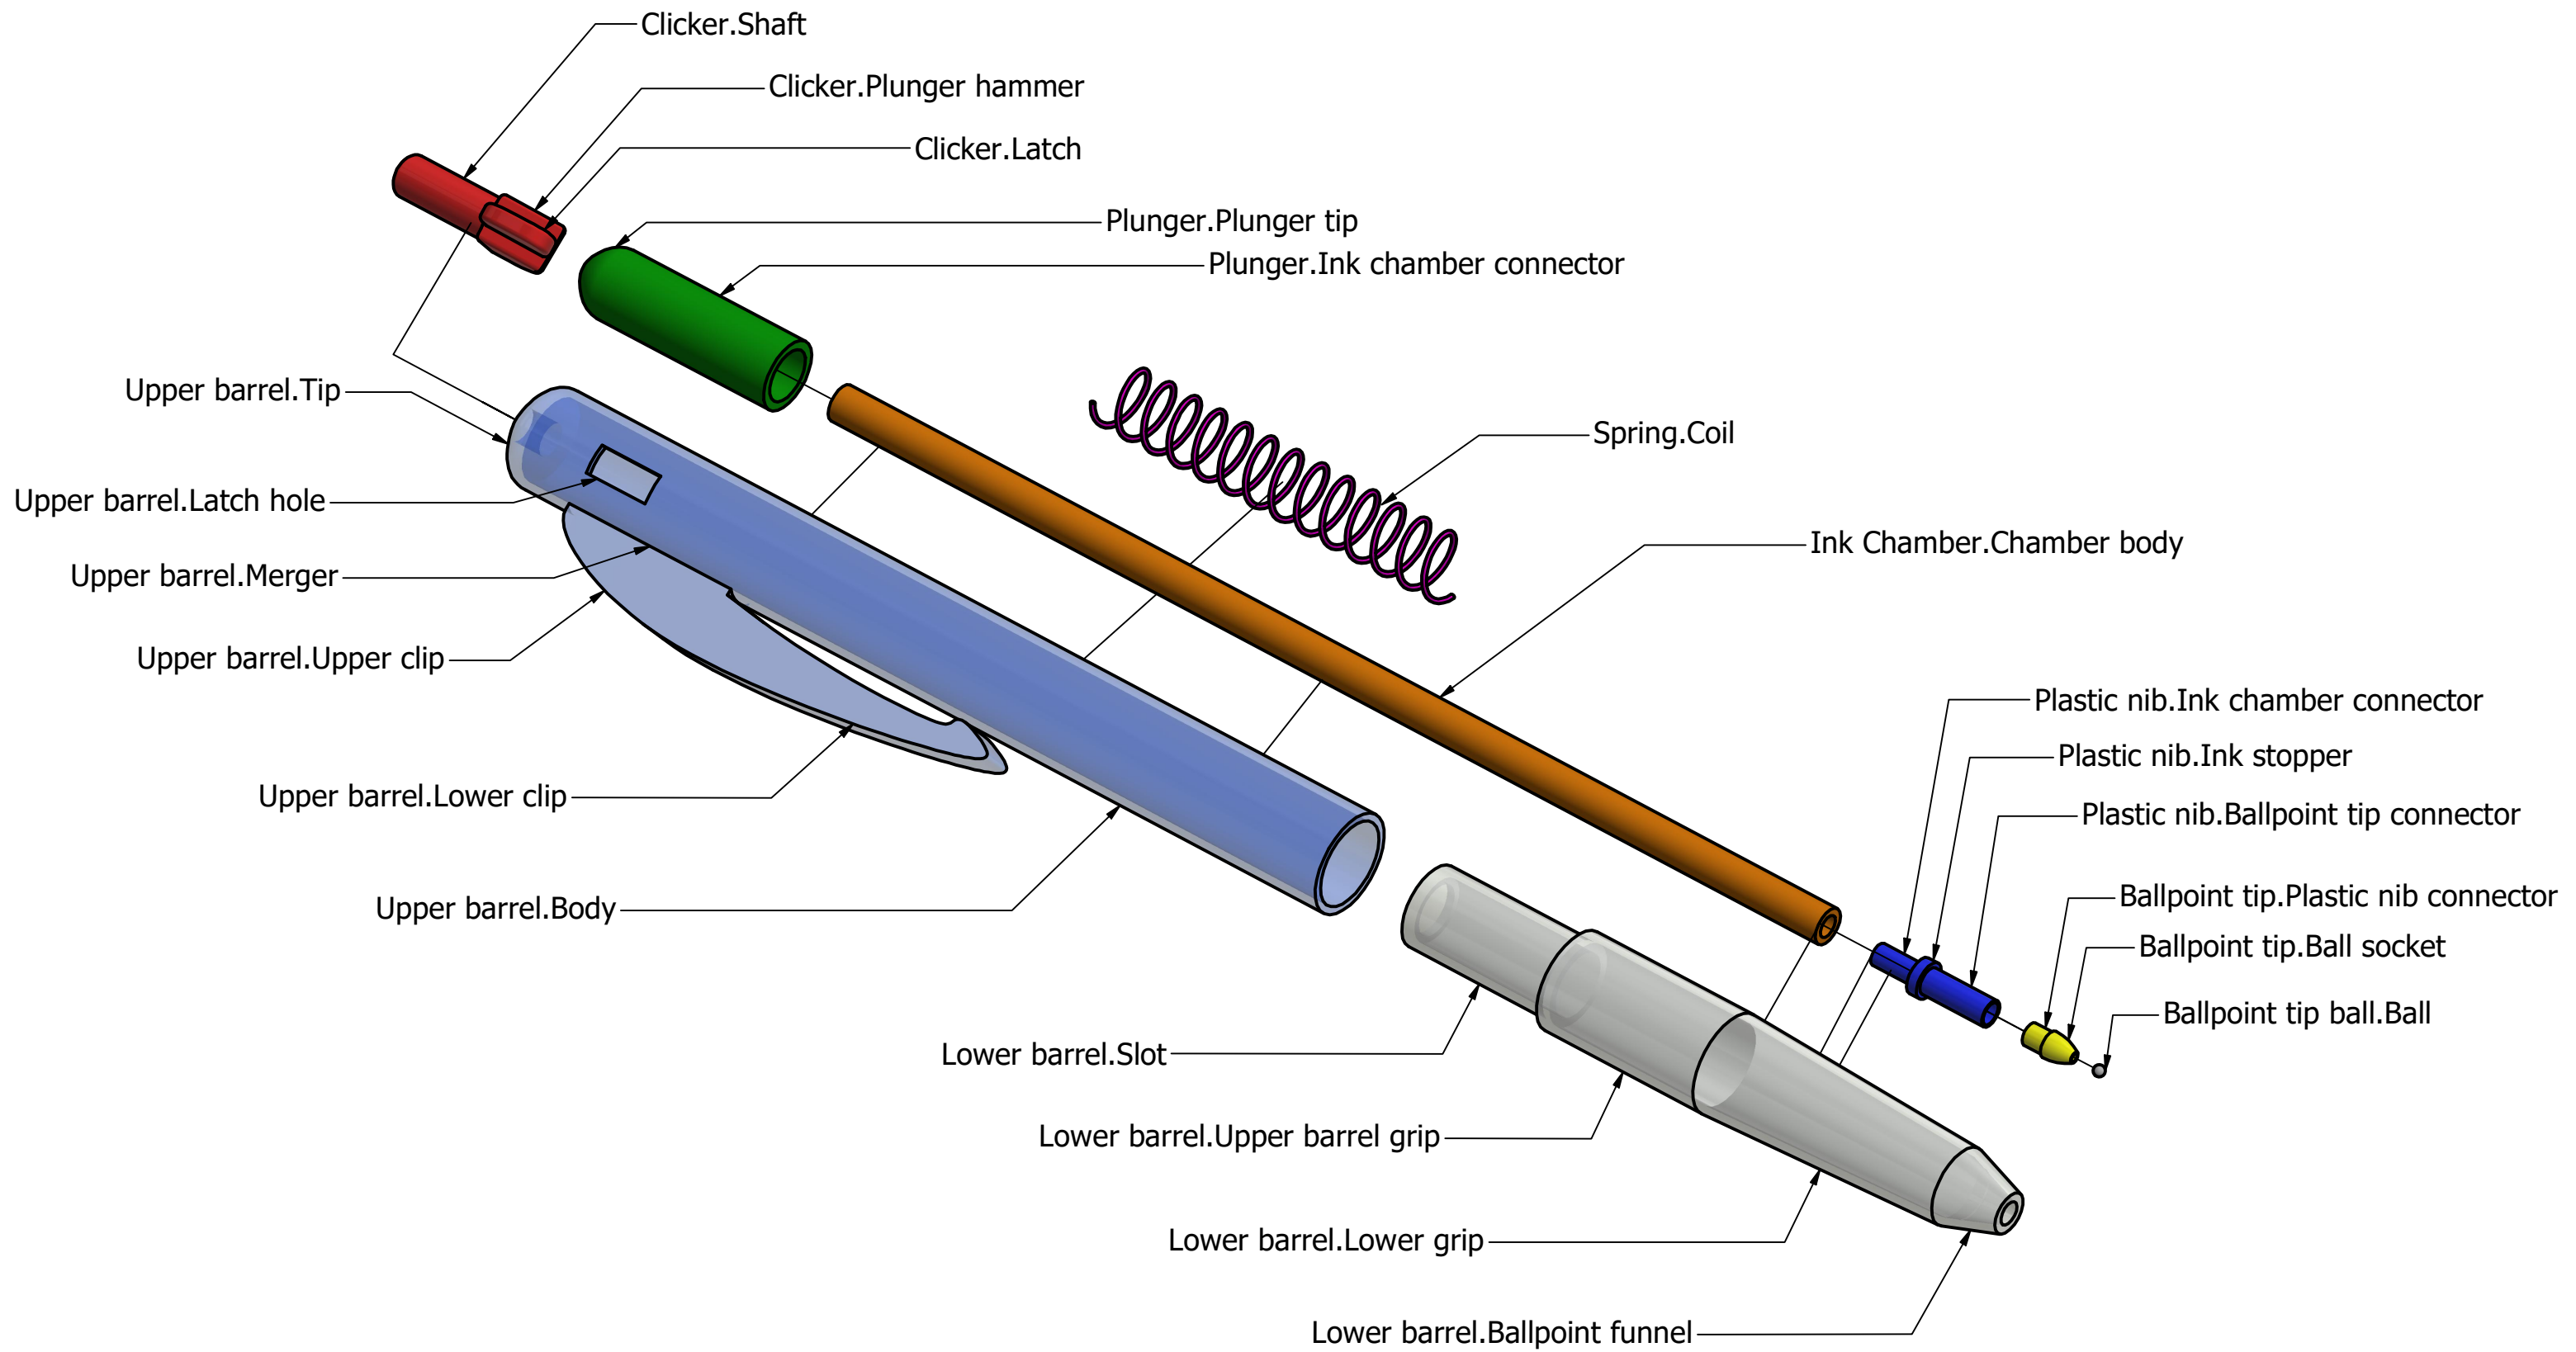

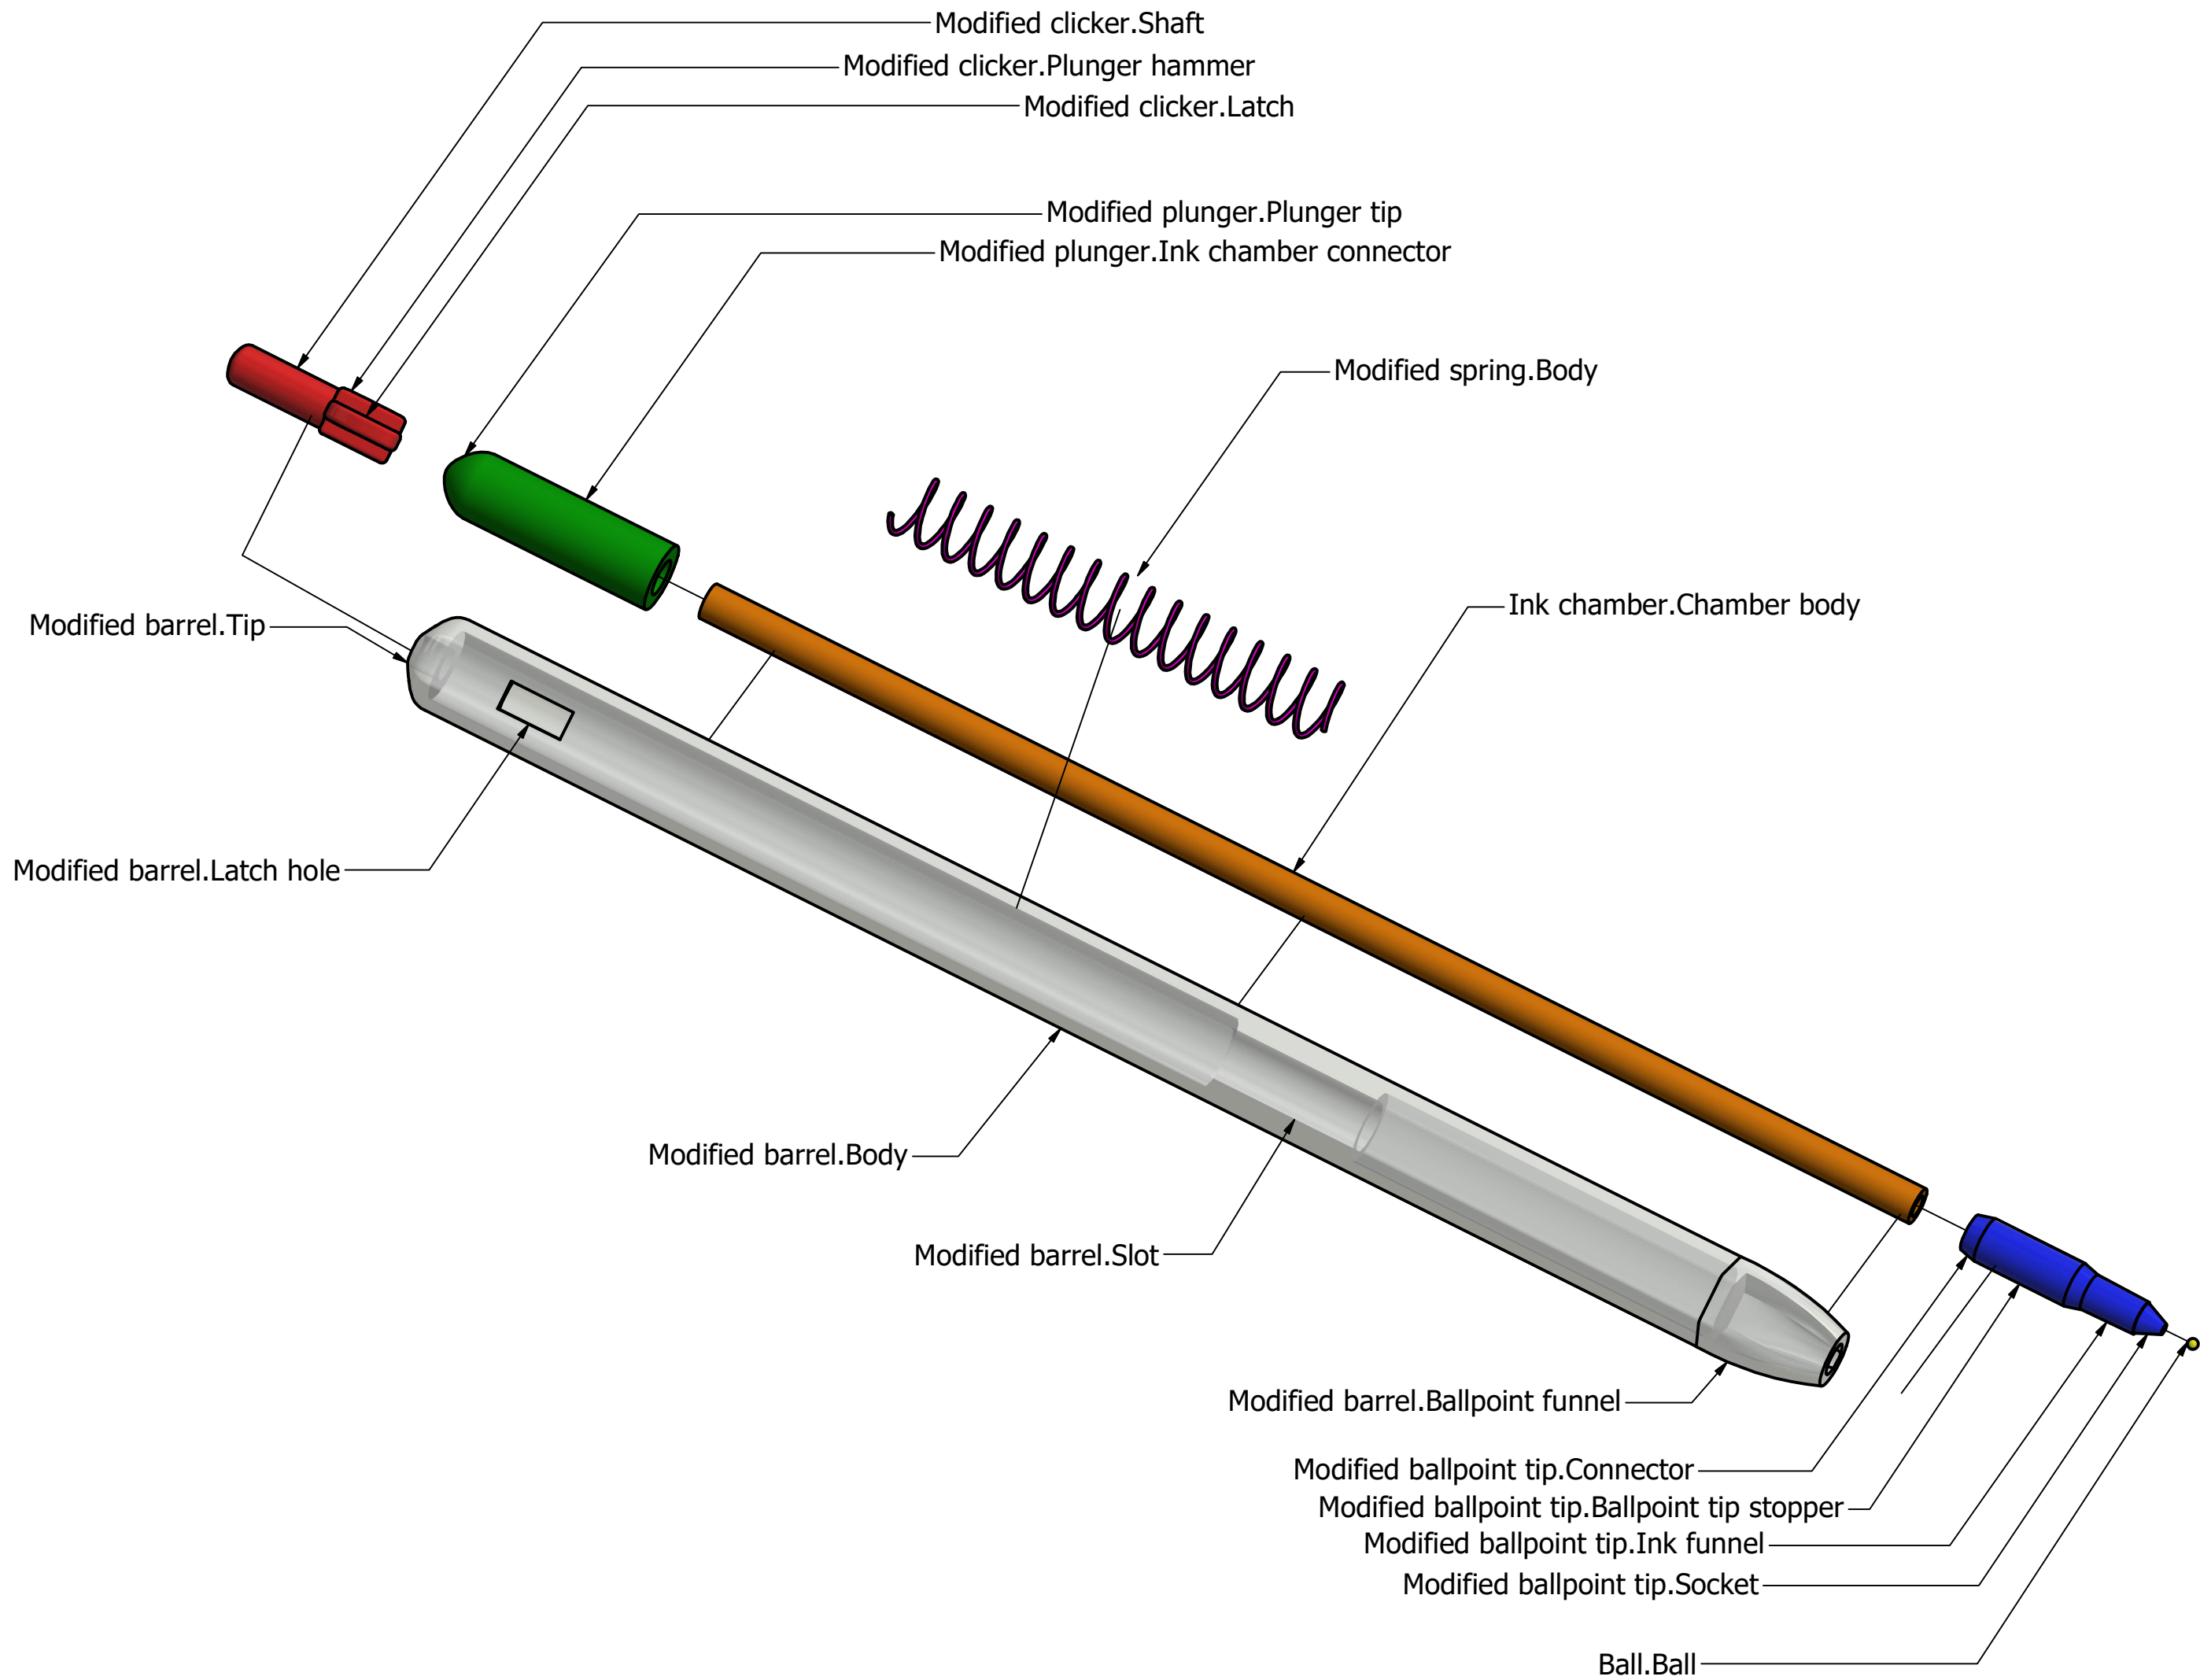

## Supplementary material for the IP camera case study

Page 7-10: Assembly drawings for the Fixed IP camera

Page 11-17: Assembly drawings for the PT IP camera

Page 18-21: DDM and ARM data for the IP cameras

Page 22-23: Assembly drawings for the new IP camera variant

*Please note: All drawings are approximate for the purpose of illustrating the modelling approaches presented in this research paper.*

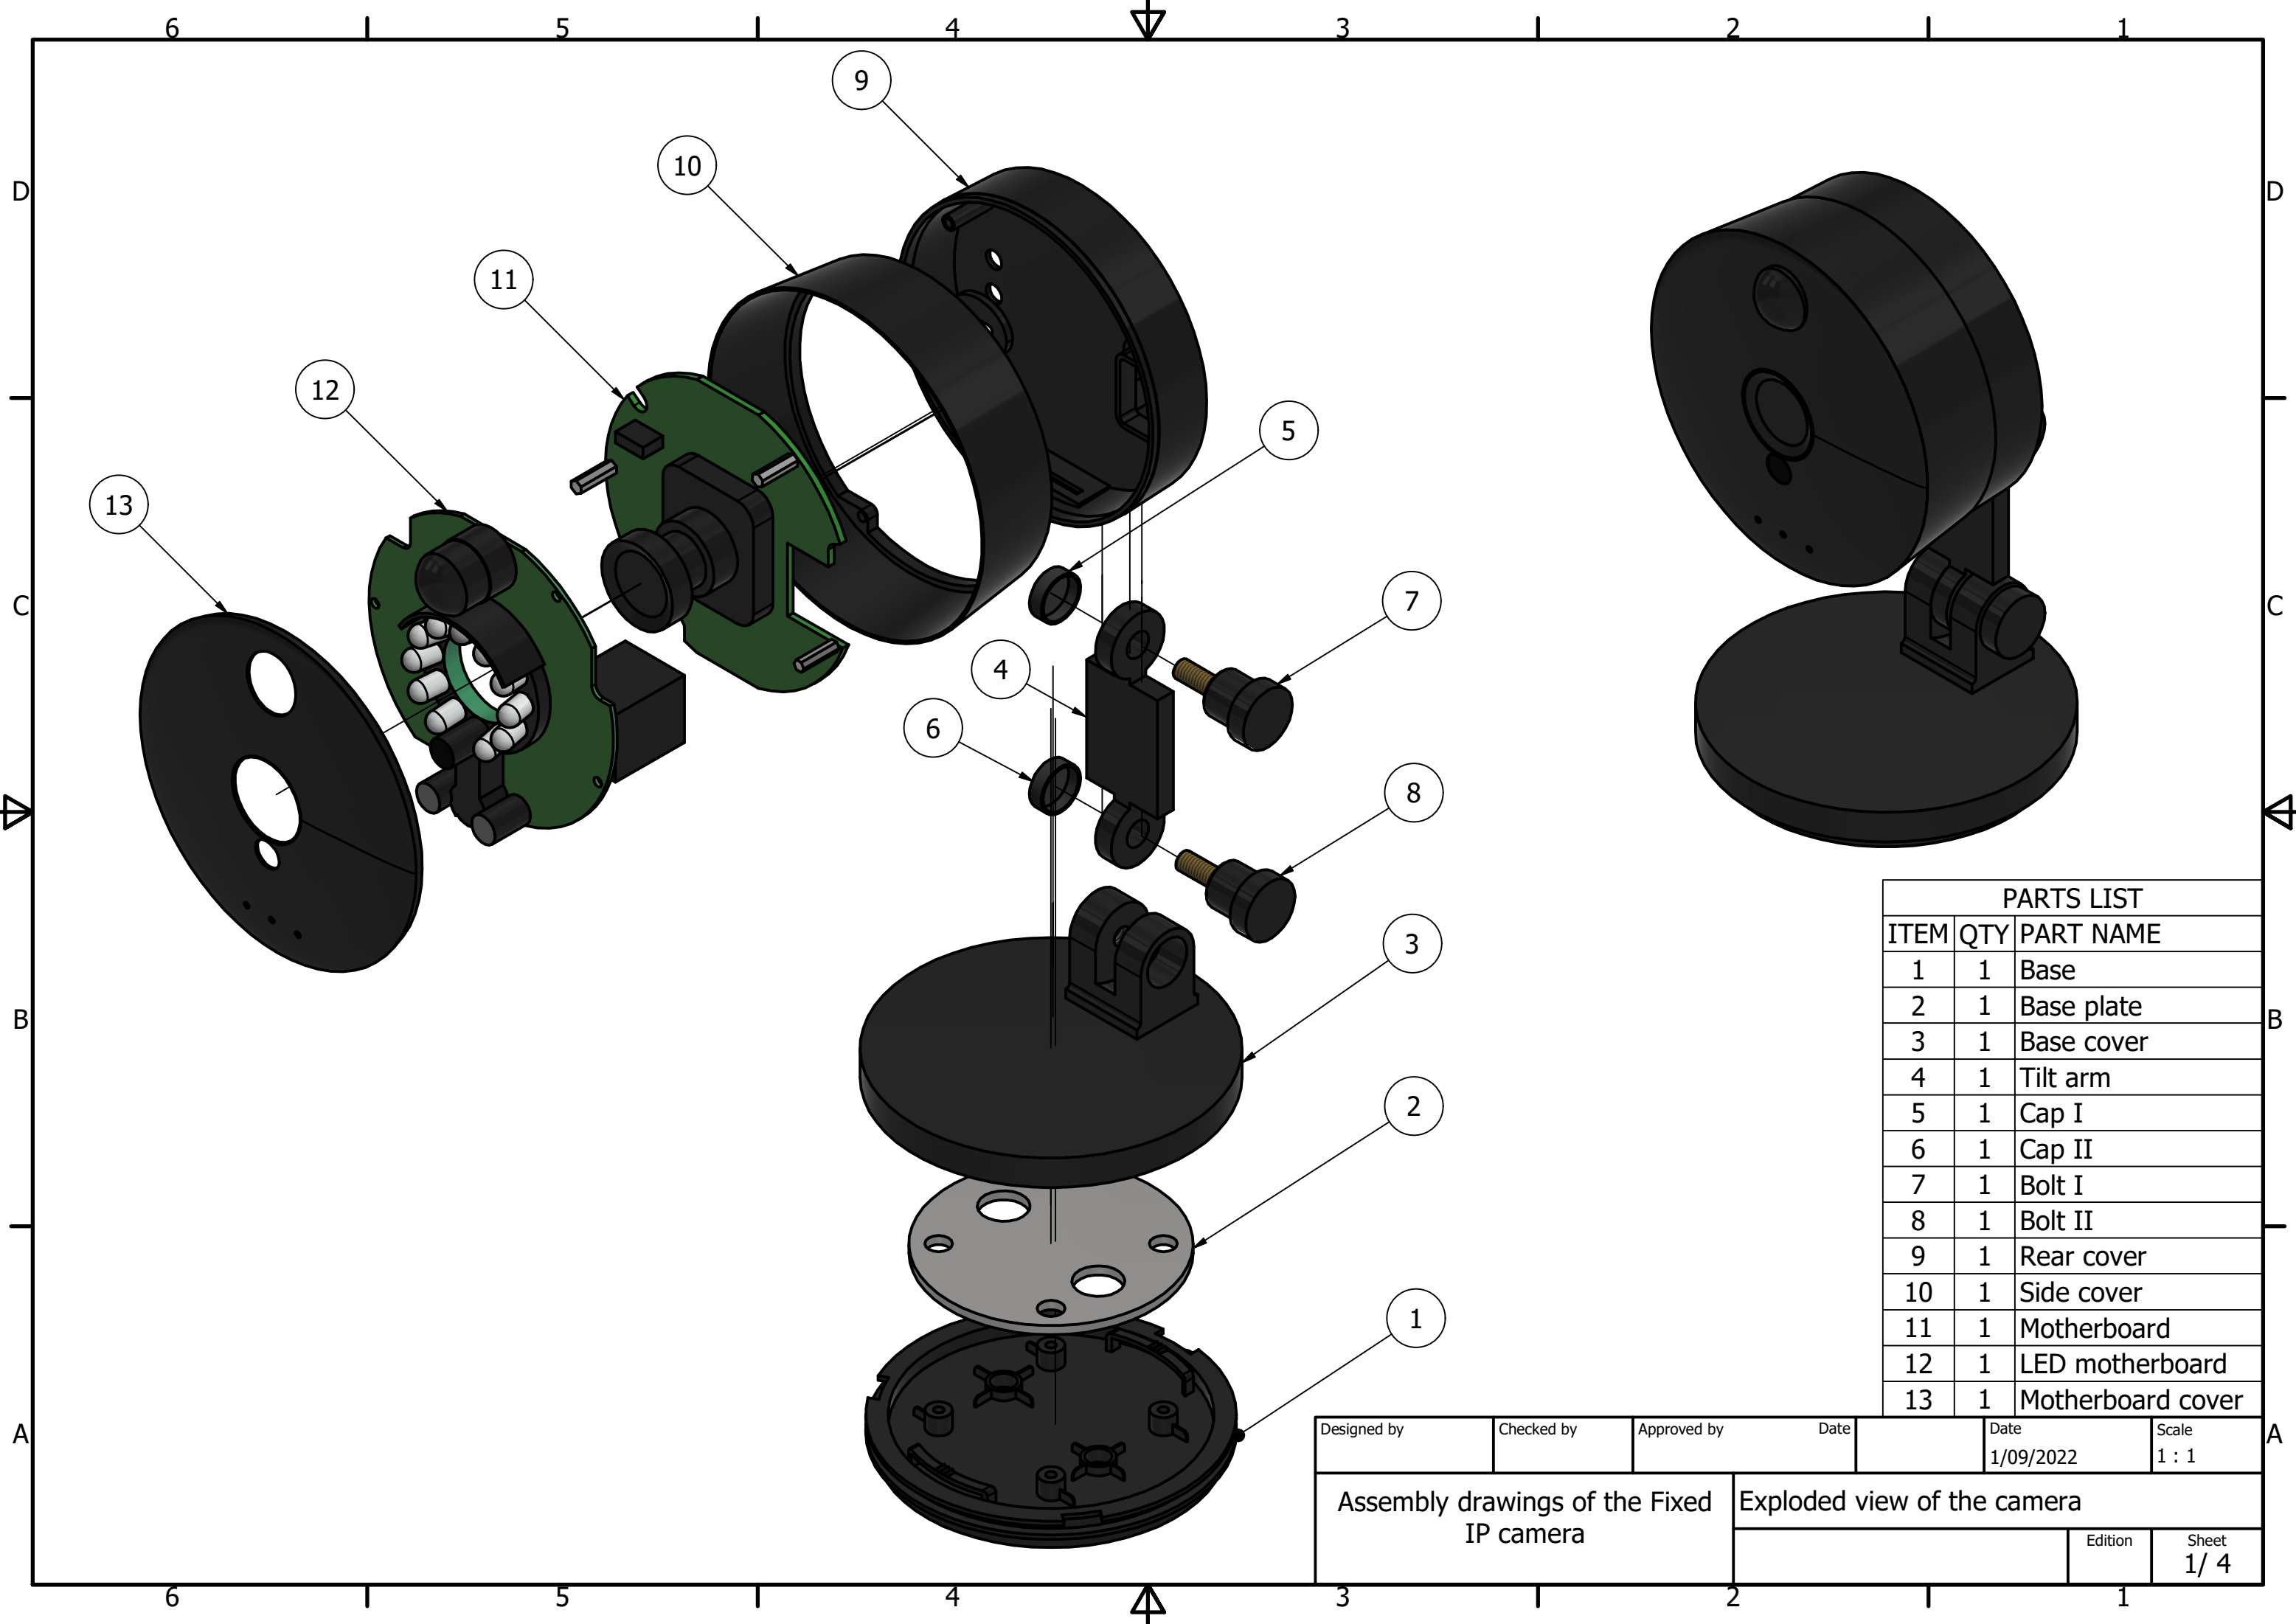

| PARTS LIST |     |                   |
|------------|-----|-------------------|
| ITEM       | QTY | PART NAME         |
| 1          | 1   | Base              |
| 2          | 1   | Base plate        |
| 3          | 1   | Base cover        |
| 4          | 1   | Tilt arm          |
| 5          | 1   | Cap I             |
| 6          | 1   | Cap II            |
| 7          | 1   | Bolt I            |
| 8          | 1   | Bolt II           |
| 9          | 1   | Rear cover        |
| 10         | 1   | Side cover        |
| 11         | 1   | Motherboard       |
| 12         | 1   | LED motherboard   |
| 13         | 1   | Motherboard cover |

|                                          |            |             |                             |           |       |
|------------------------------------------|------------|-------------|-----------------------------|-----------|-------|
| Designed by                              | Checked by | Approved by | Date                        | Date      | Scale |
|                                          |            |             |                             | 1/09/2022 | 1 : 1 |
| Assembly drawings of the Fixed IP camera |            |             | Exploded view of the camera |           |       |
|                                          |            |             | Edition                     | Sheet     |       |
|                                          |            |             |                             | 1/ 4      |       |

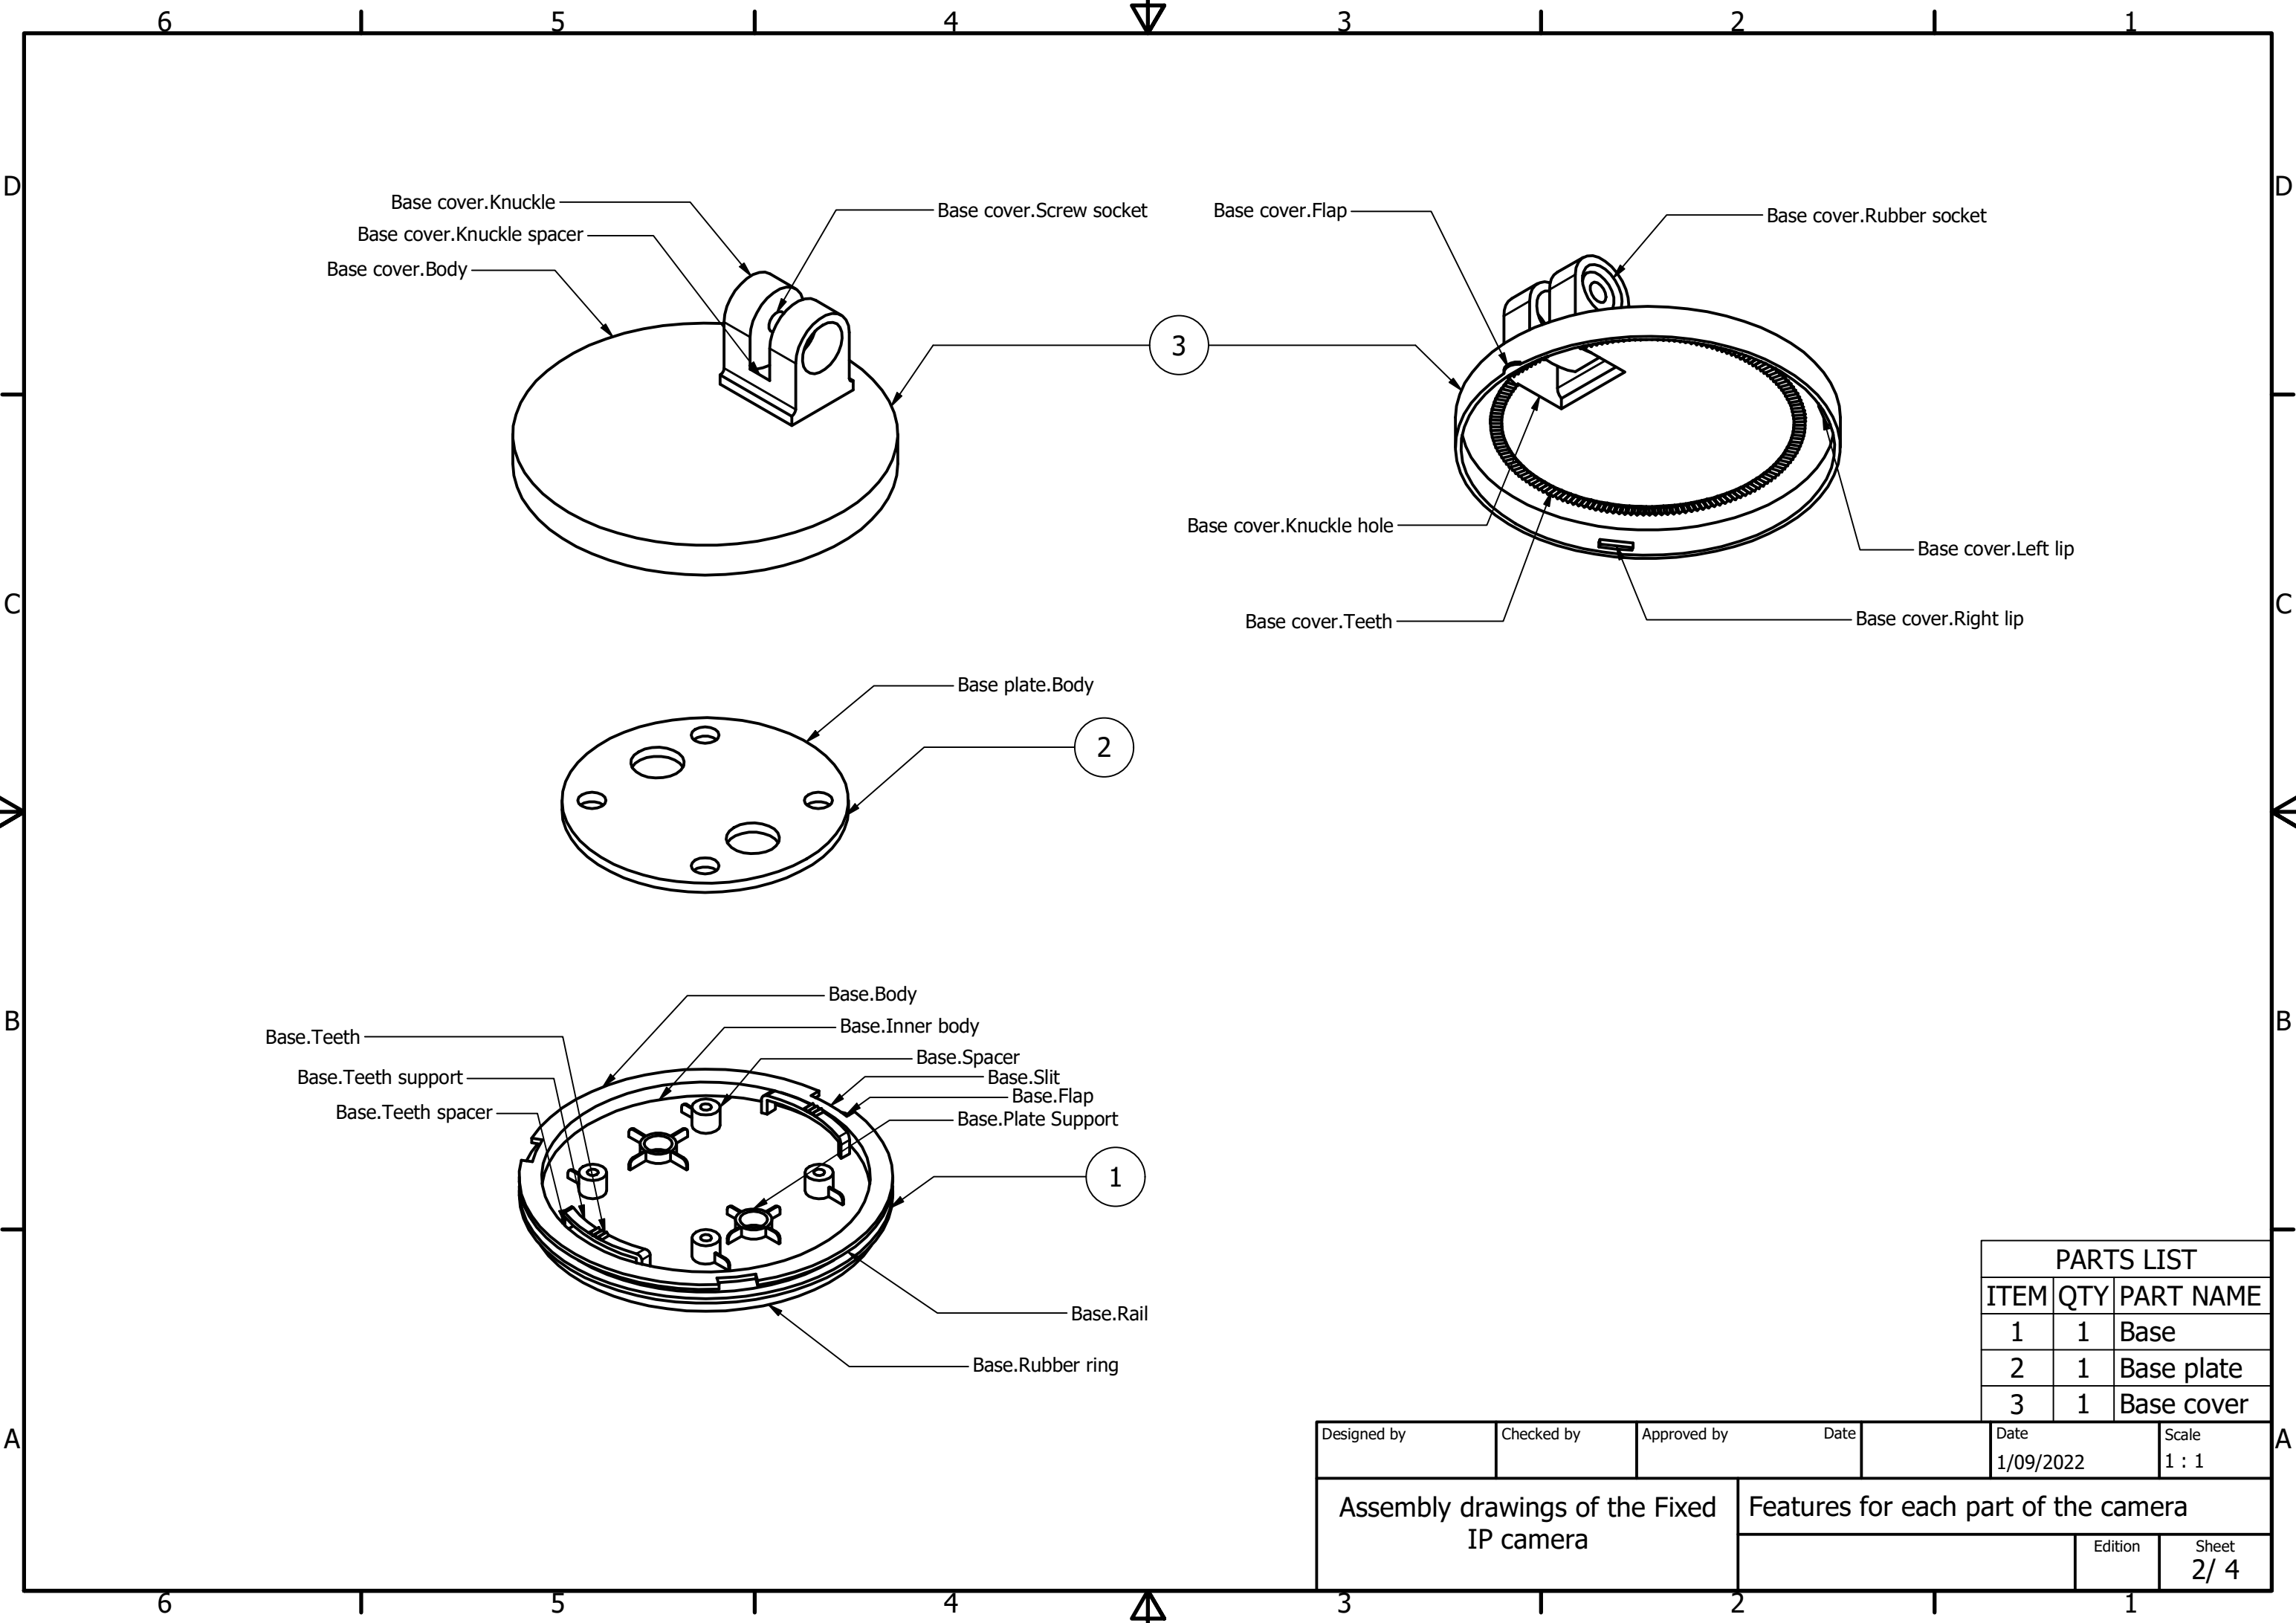

| PARTS LIST |     |            |
|------------|-----|------------|
| ITEM       | QTY | PART NAME  |
| 1          | 1   | Base       |
| 2          | 1   | Base plate |
| 3          | 1   | Base cover |

|                                          |            |             |                                      |           |       |
|------------------------------------------|------------|-------------|--------------------------------------|-----------|-------|
| Designed by                              | Checked by | Approved by | Date                                 | Date      | Scale |
|                                          |            |             |                                      | 1/09/2022 | 1 : 1 |
| Assembly drawings of the Fixed IP camera |            |             | Features for each part of the camera |           |       |
|                                          |            |             | Edition                              | Sheet     |       |
|                                          |            |             |                                      | 2/ 4      |       |



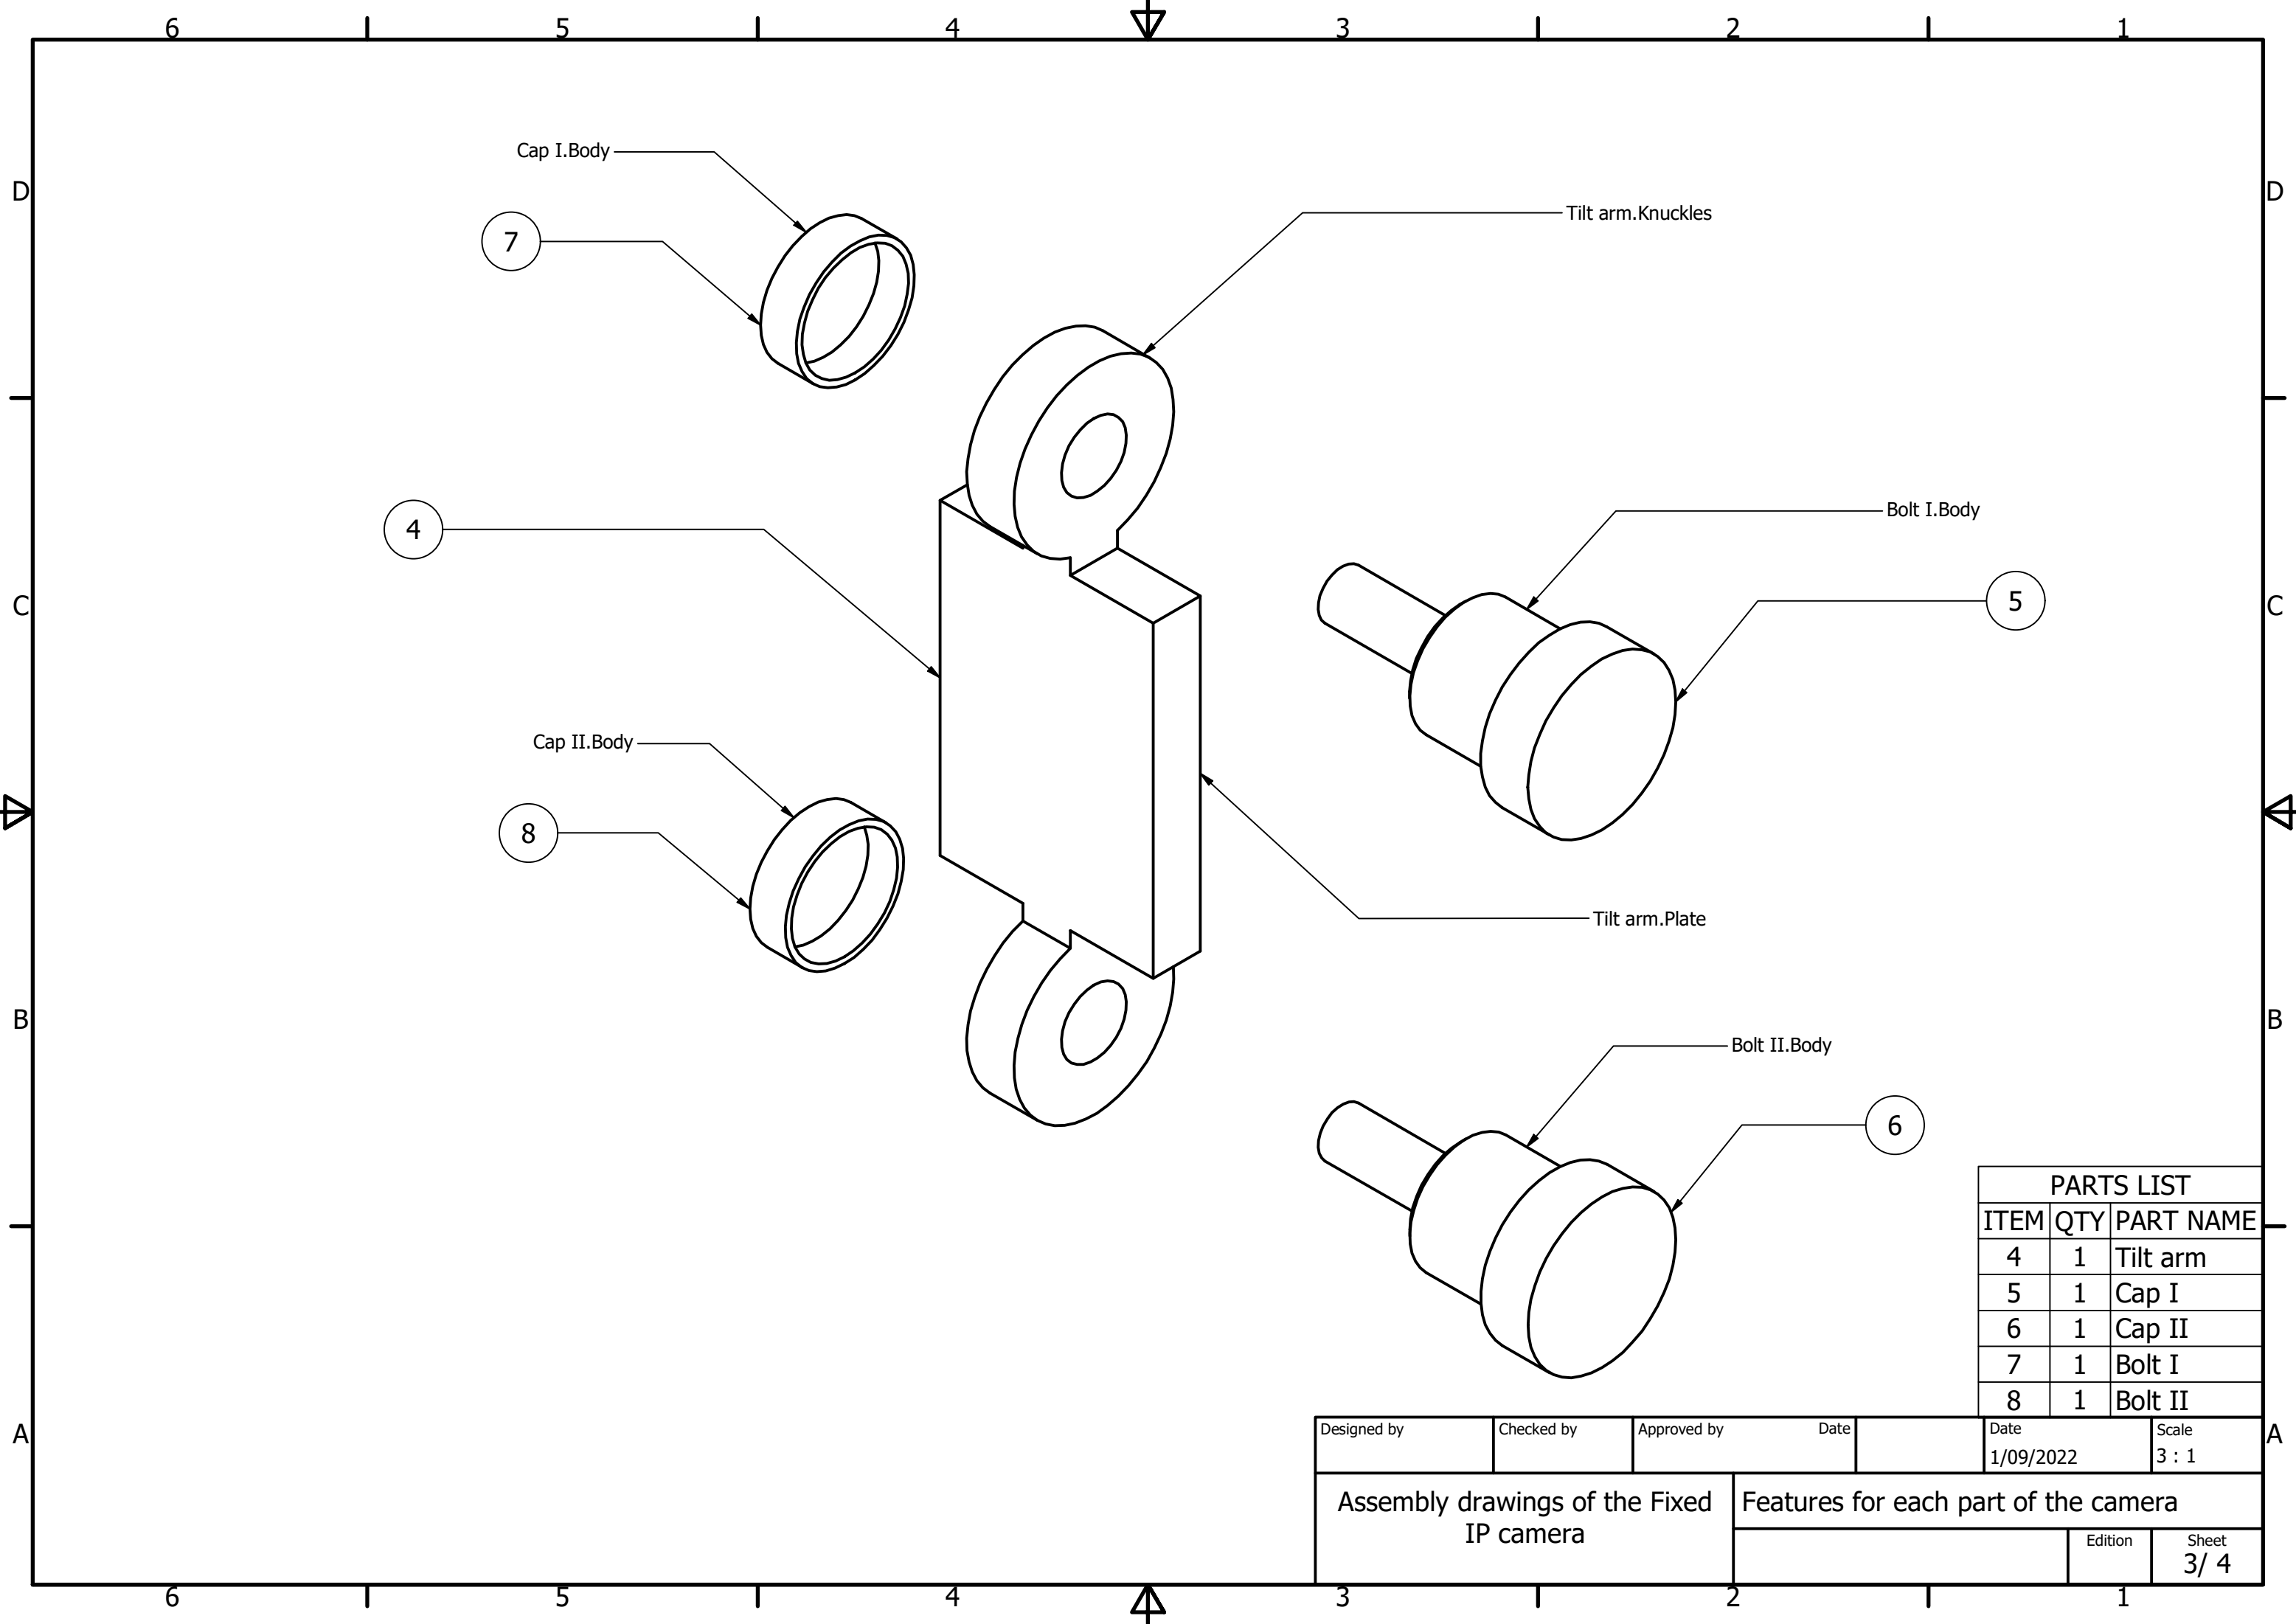

| PARTS LIST |     |           |
|------------|-----|-----------|
| ITEM       | QTY | PART NAME |
| 4          | 1   | Tilt arm  |
| 5          | 1   | Cap I     |
| 6          | 1   | Cap II    |
| 7          | 1   | Bolt I    |
| 8          | 1   | Bolt II   |

|                                          |            |             |                                      |           |       |
|------------------------------------------|------------|-------------|--------------------------------------|-----------|-------|
| Designed by                              | Checked by | Approved by | Date                                 | Date      | Scale |
|                                          |            |             |                                      | 1/09/2022 | 3 : 1 |
| Assembly drawings of the Fixed IP camera |            |             | Features for each part of the camera |           |       |
|                                          |            |             | Edition                              | Sheet     |       |
|                                          |            |             |                                      | 3/ 4      |       |

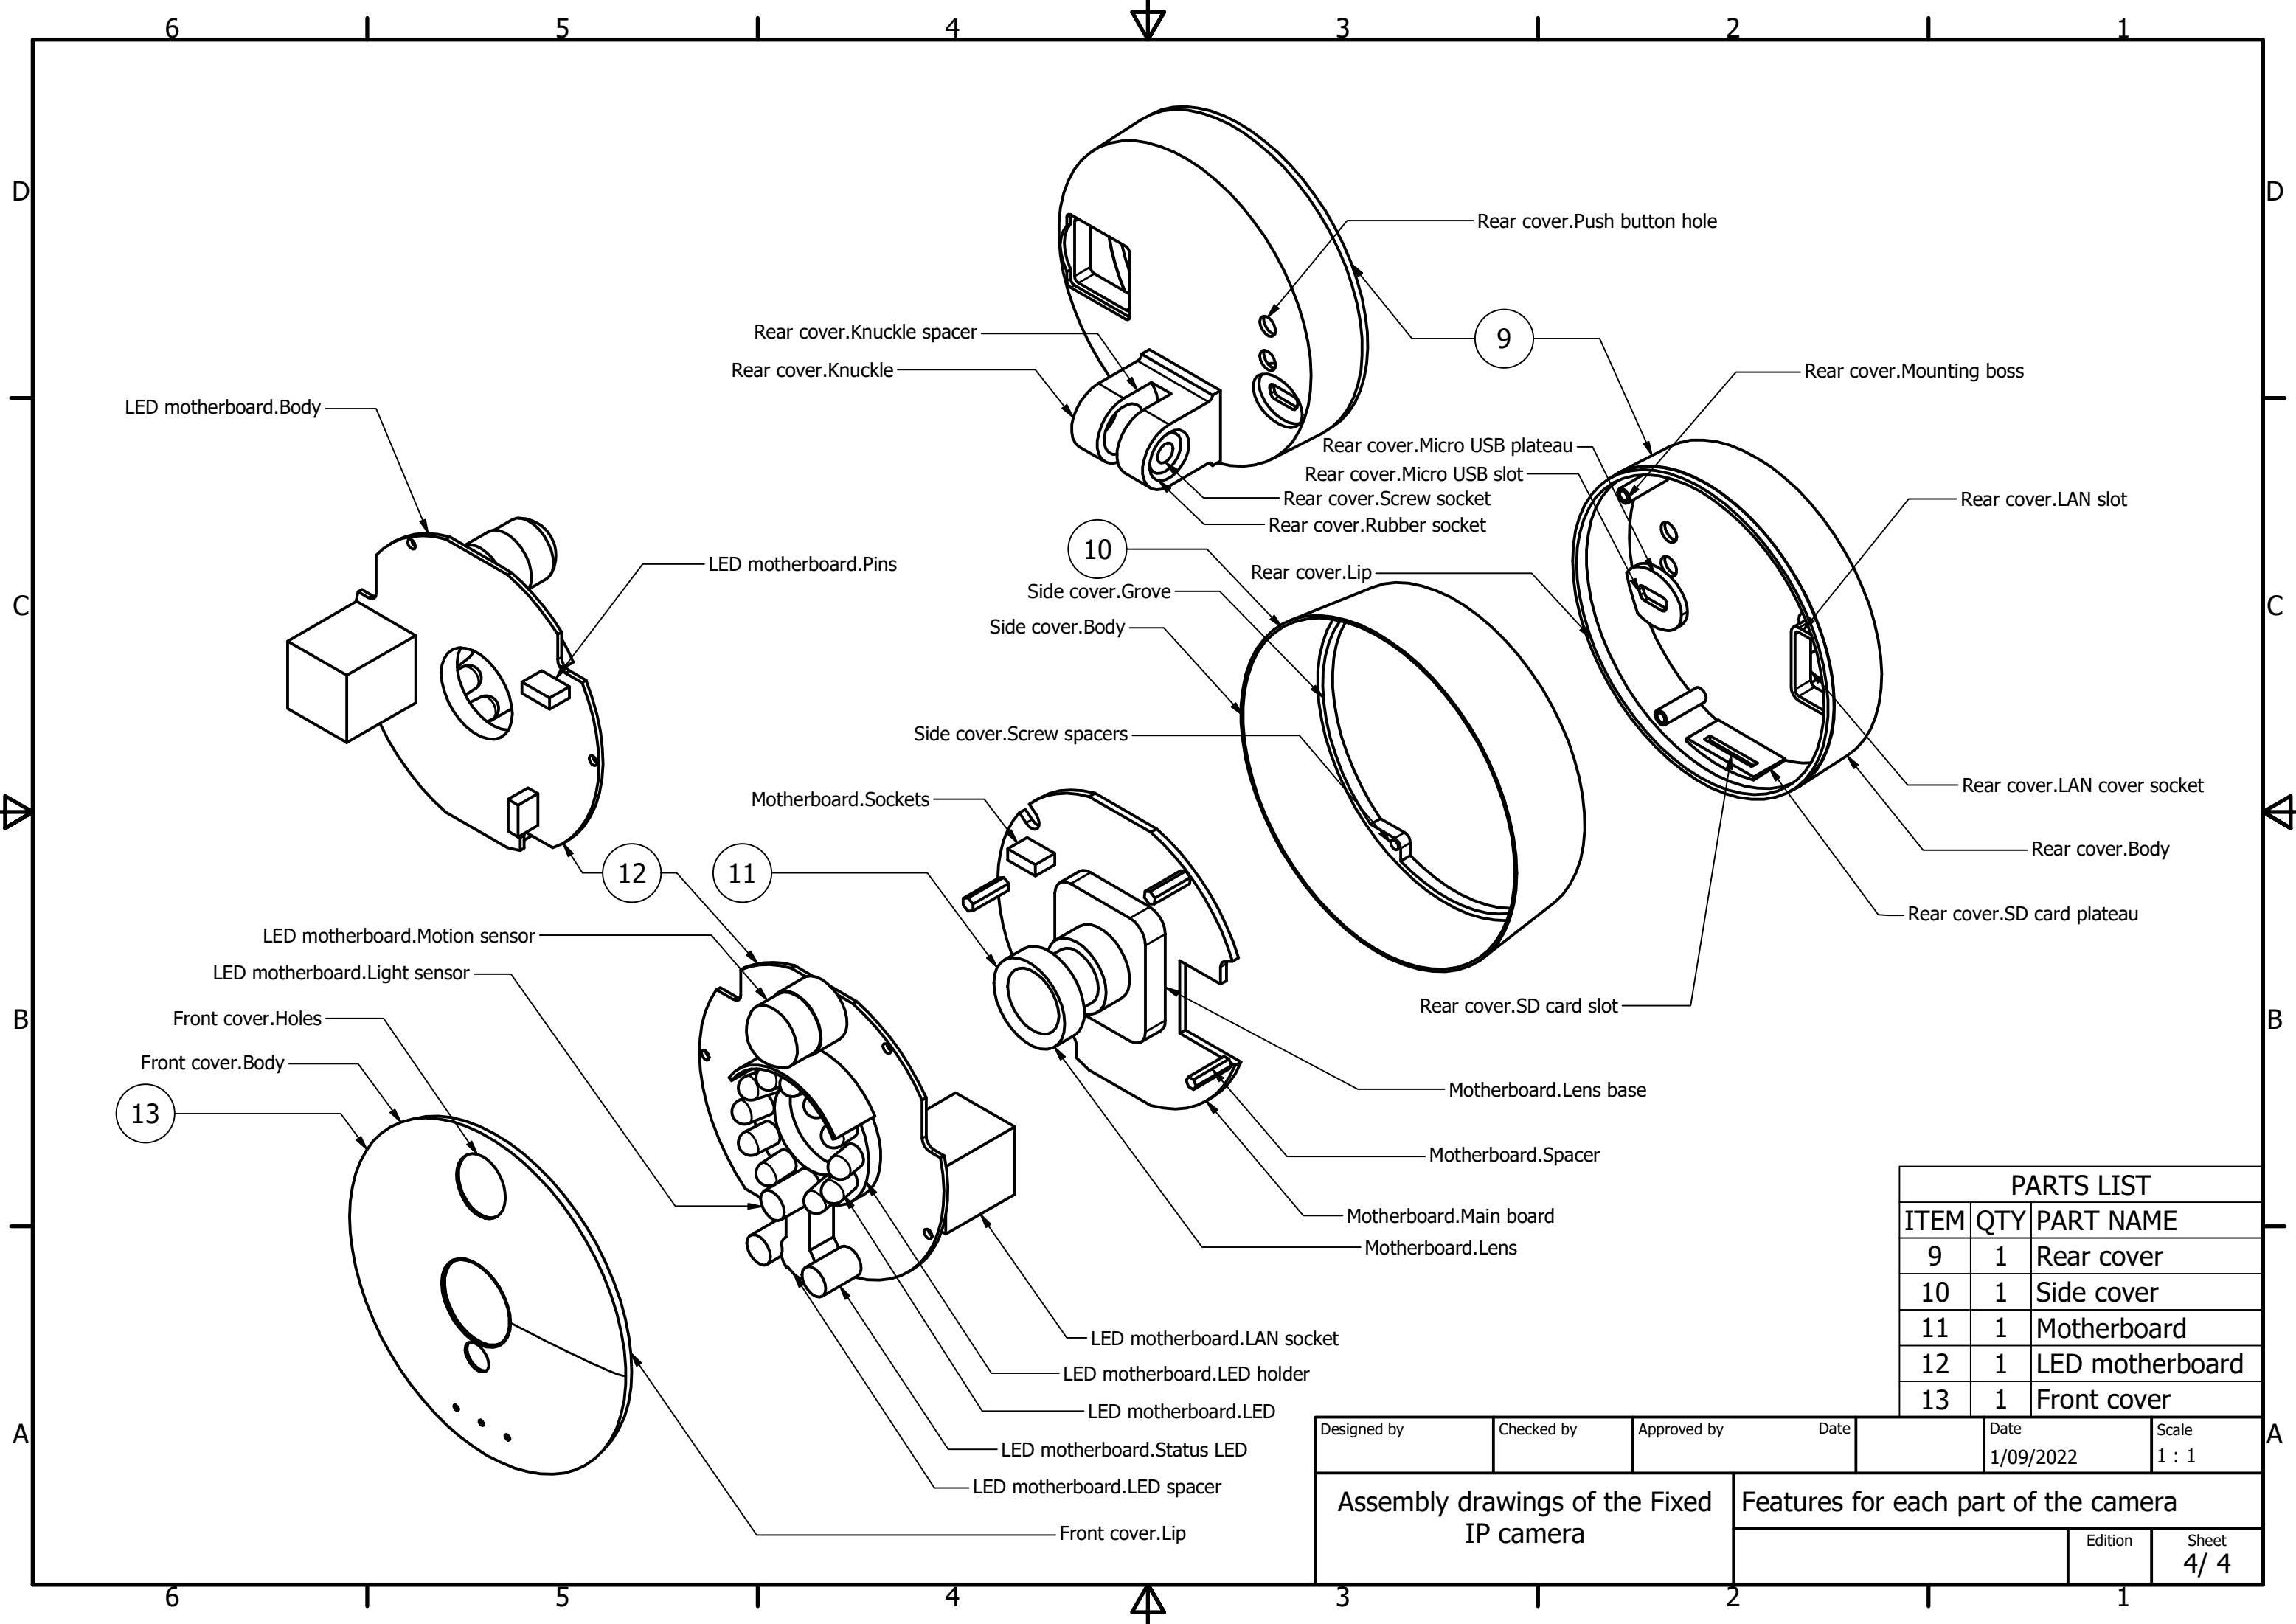

| PARTS LIST |     |                 |
|------------|-----|-----------------|
| ITEM       | QTY | PART NAME       |
| 9          | 1   | Rear cover      |
| 10         | 1   | Side cover      |
| 11         | 1   | Motherboard     |
| 12         | 1   | LED motherboard |
| 13         | 1   | Front cover     |

|                                          |            |             |                                      |           |       |
|------------------------------------------|------------|-------------|--------------------------------------|-----------|-------|
| Designed by                              | Checked by | Approved by | Date                                 | Date      | Scale |
|                                          |            |             |                                      | 1/09/2022 | 1 : 1 |
| Assembly drawings of the Fixed IP camera |            |             | Features for each part of the camera |           |       |
|                                          |            |             | Edition                              | Sheet     |       |
|                                          |            |             |                                      | 4/ 4      |       |

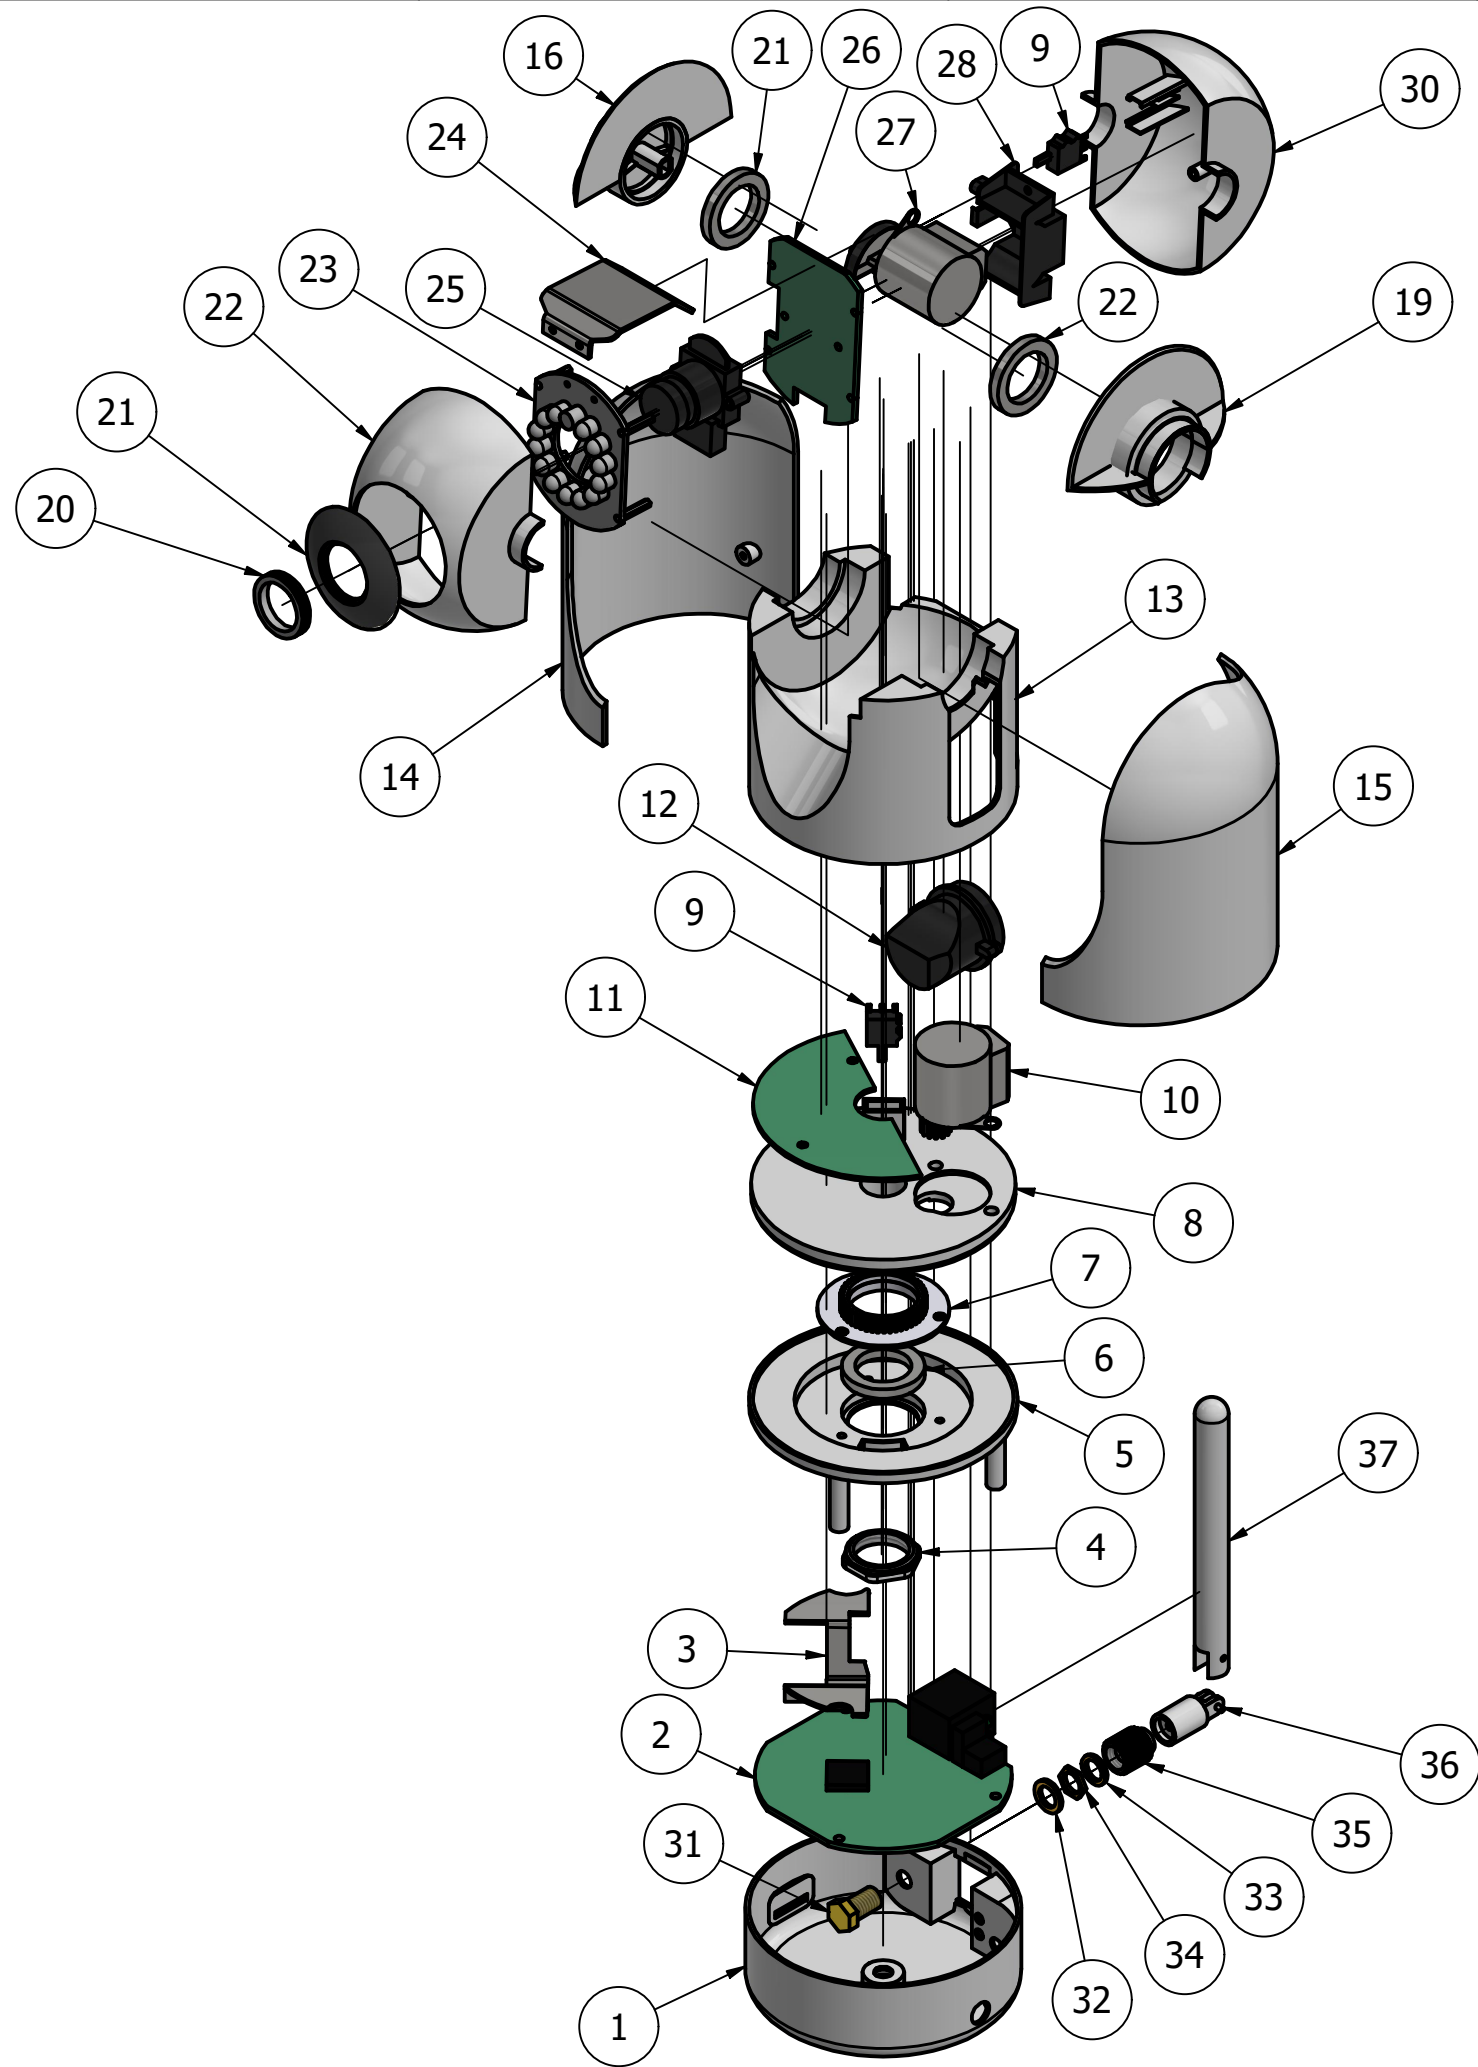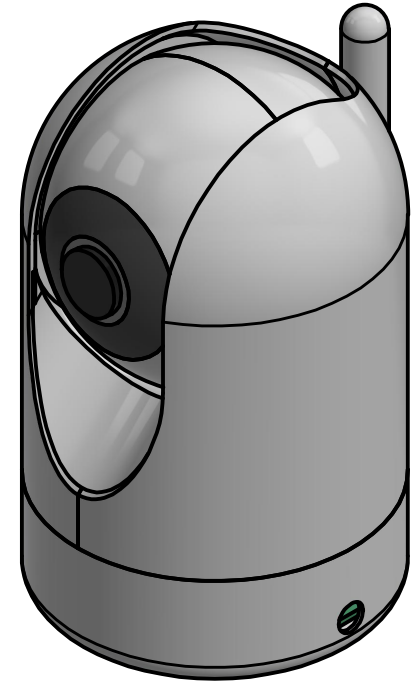

| PARTS LIST |     |                        | PARTS LIST |     |                    |
|------------|-----|------------------------|------------|-----|--------------------|
| ITEM       | QTY | PART NAME              | ITEM       | QTY | PART NAME          |
| 1          | 1   | Base                   | 20         | 1   | Camera seal        |
| 2          | 1   | Motherboard            | 21         | 1   | Led cover          |
| 3          | 1   | Heatsink               | 22         | 1   | Camera front shell |
| 4          | 1   | Nut                    | 23         | 1   | Led motherboard    |
| 5          | 1   | Base Cover             | 24         | 1   | Motherboard shield |
| 6          | 1   | Bearing (Pan)          | 25         | 1   | Lens               |
| 7          | 1   | Bearing Cover          | 26         | 1   | Camera motherboard |
| 8          | 1   | Rotating platform      | 27         | 1   | Tilt motor         |
| 9          | 1   | Sensor (Pan)           | 28         | 1   | Motor casing       |
| 10         | 1   | Pan motor              | 29         | 1   | Sensor (Tilt)      |
| 11         | 1   | Daughter board         | 30         | 1   | Camera rear shell  |
| 12         | 1   | Speaker                | 31         | 1   | WiFi SMA connector |
| 13         | 1   | Tilt base              | 32         | 1   | WiFi SMA trim      |
| 14         | 1   | LHS casing             | 33         | 1   | WiFi SMA washer    |
| 15         | 1   | RHS casing             | 34         | 1   | WiFi SMA nut       |
| 16         | 1   | Tilt LHS support       | 35         | 1   | WiFi insert        |
| 17         | 1   | Bearing (Tilt - left)  | 36         | 1   | WiFi arm           |
| 18         | 1   | Bearing (Tilt - right) | 37         | 1   | WiFi antenna       |
| 19         | 1   | Tilt RHS support       |            |     |                    |

|                                       |            |             |                                   |          |        |
|---------------------------------------|------------|-------------|-----------------------------------|----------|--------|
| Designed by                           | Checked by | Approved by | Date                              | Date     | Scale  |
|                                       |            |             |                                   | 28/08/22 | 7 : 10 |
| Assembly drawings of the PT IP camera |            |             | Exploded view of the PT IP camera |          |        |
|                                       |            |             | Edition                           | Sheet    |        |
|                                       |            |             |                                   | 1 / 7    |        |

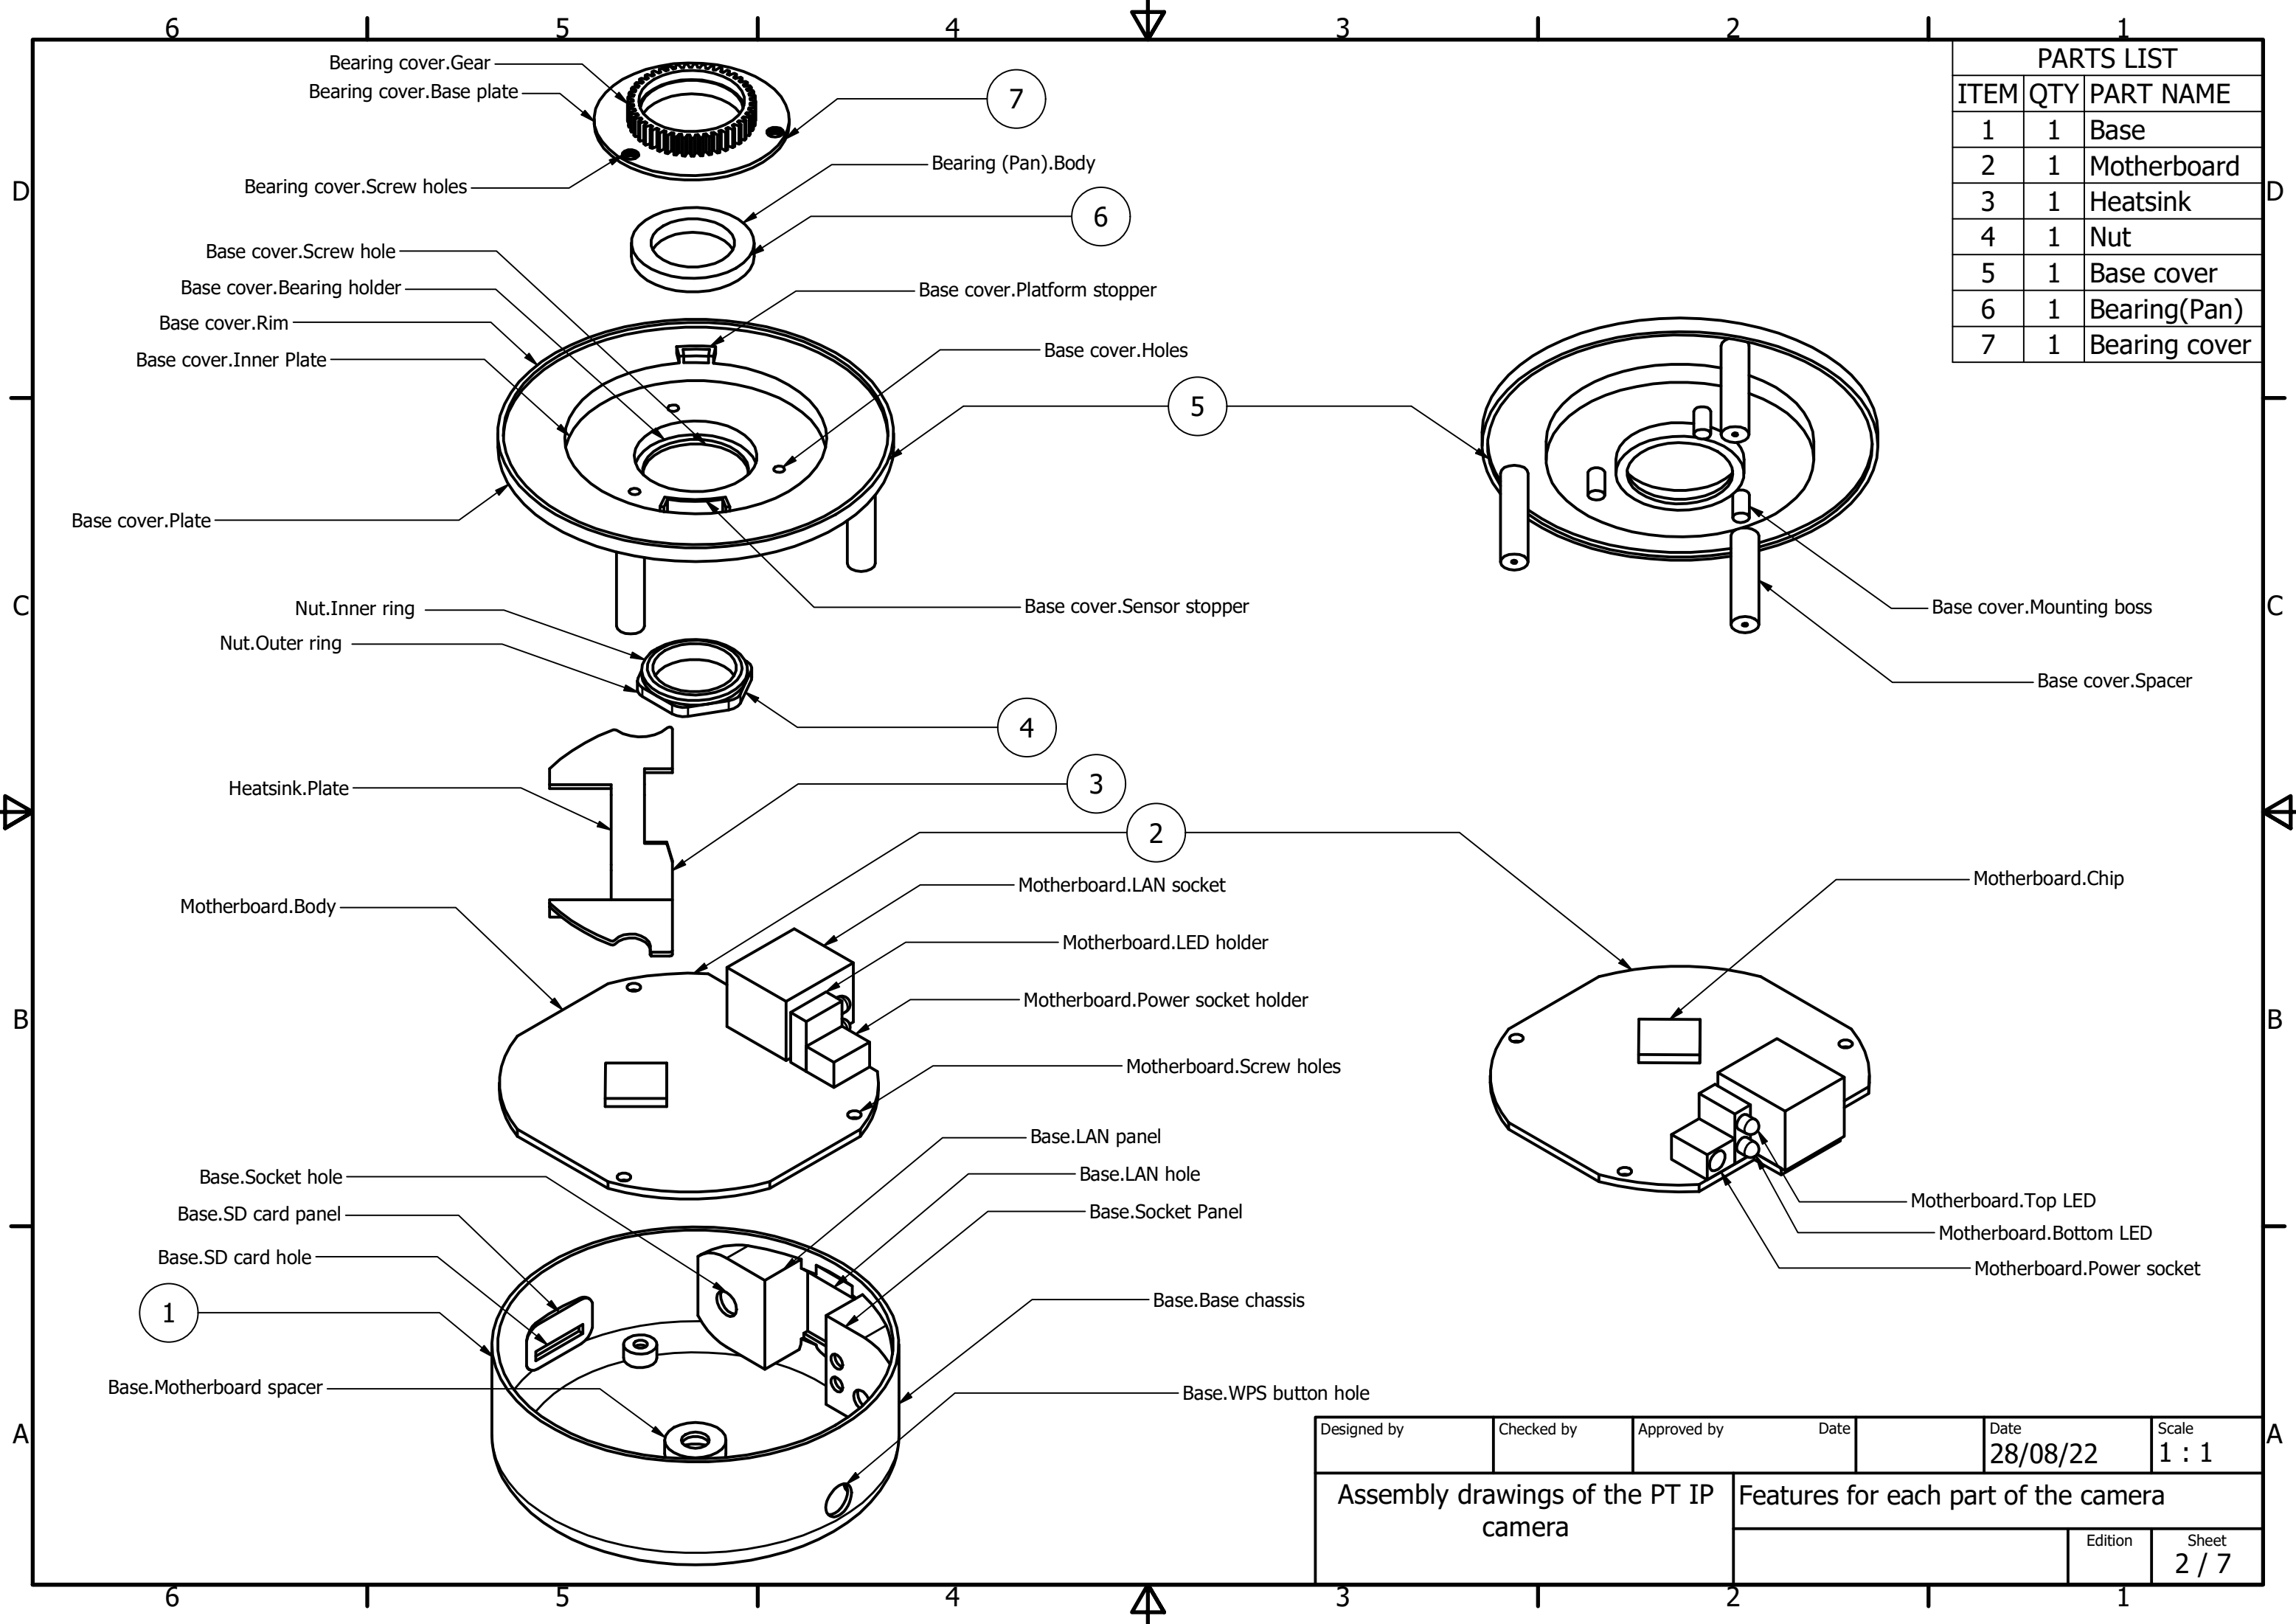

| PARTS LIST |     |               |
|------------|-----|---------------|
| ITEM       | QTY | PART NAME     |
| 1          | 1   | Base          |
| 2          | 1   | Motherboard   |
| 3          | 1   | Heatsink      |
| 4          | 1   | Nut           |
| 5          | 1   | Base cover    |
| 6          | 1   | Bearing(Pan)  |
| 7          | 1   | Bearing cover |

|                                       |            |             |                                      |          |       |
|---------------------------------------|------------|-------------|--------------------------------------|----------|-------|
| Designed by                           | Checked by | Approved by | Date                                 | Date     | Scale |
|                                       |            |             |                                      | 28/08/22 | 1 : 1 |
| Assembly drawings of the PT IP camera |            |             | Features for each part of the camera |          |       |
|                                       |            |             | Edition                              | Sheet    |       |
|                                       |            |             |                                      | 2 / 7    |       |

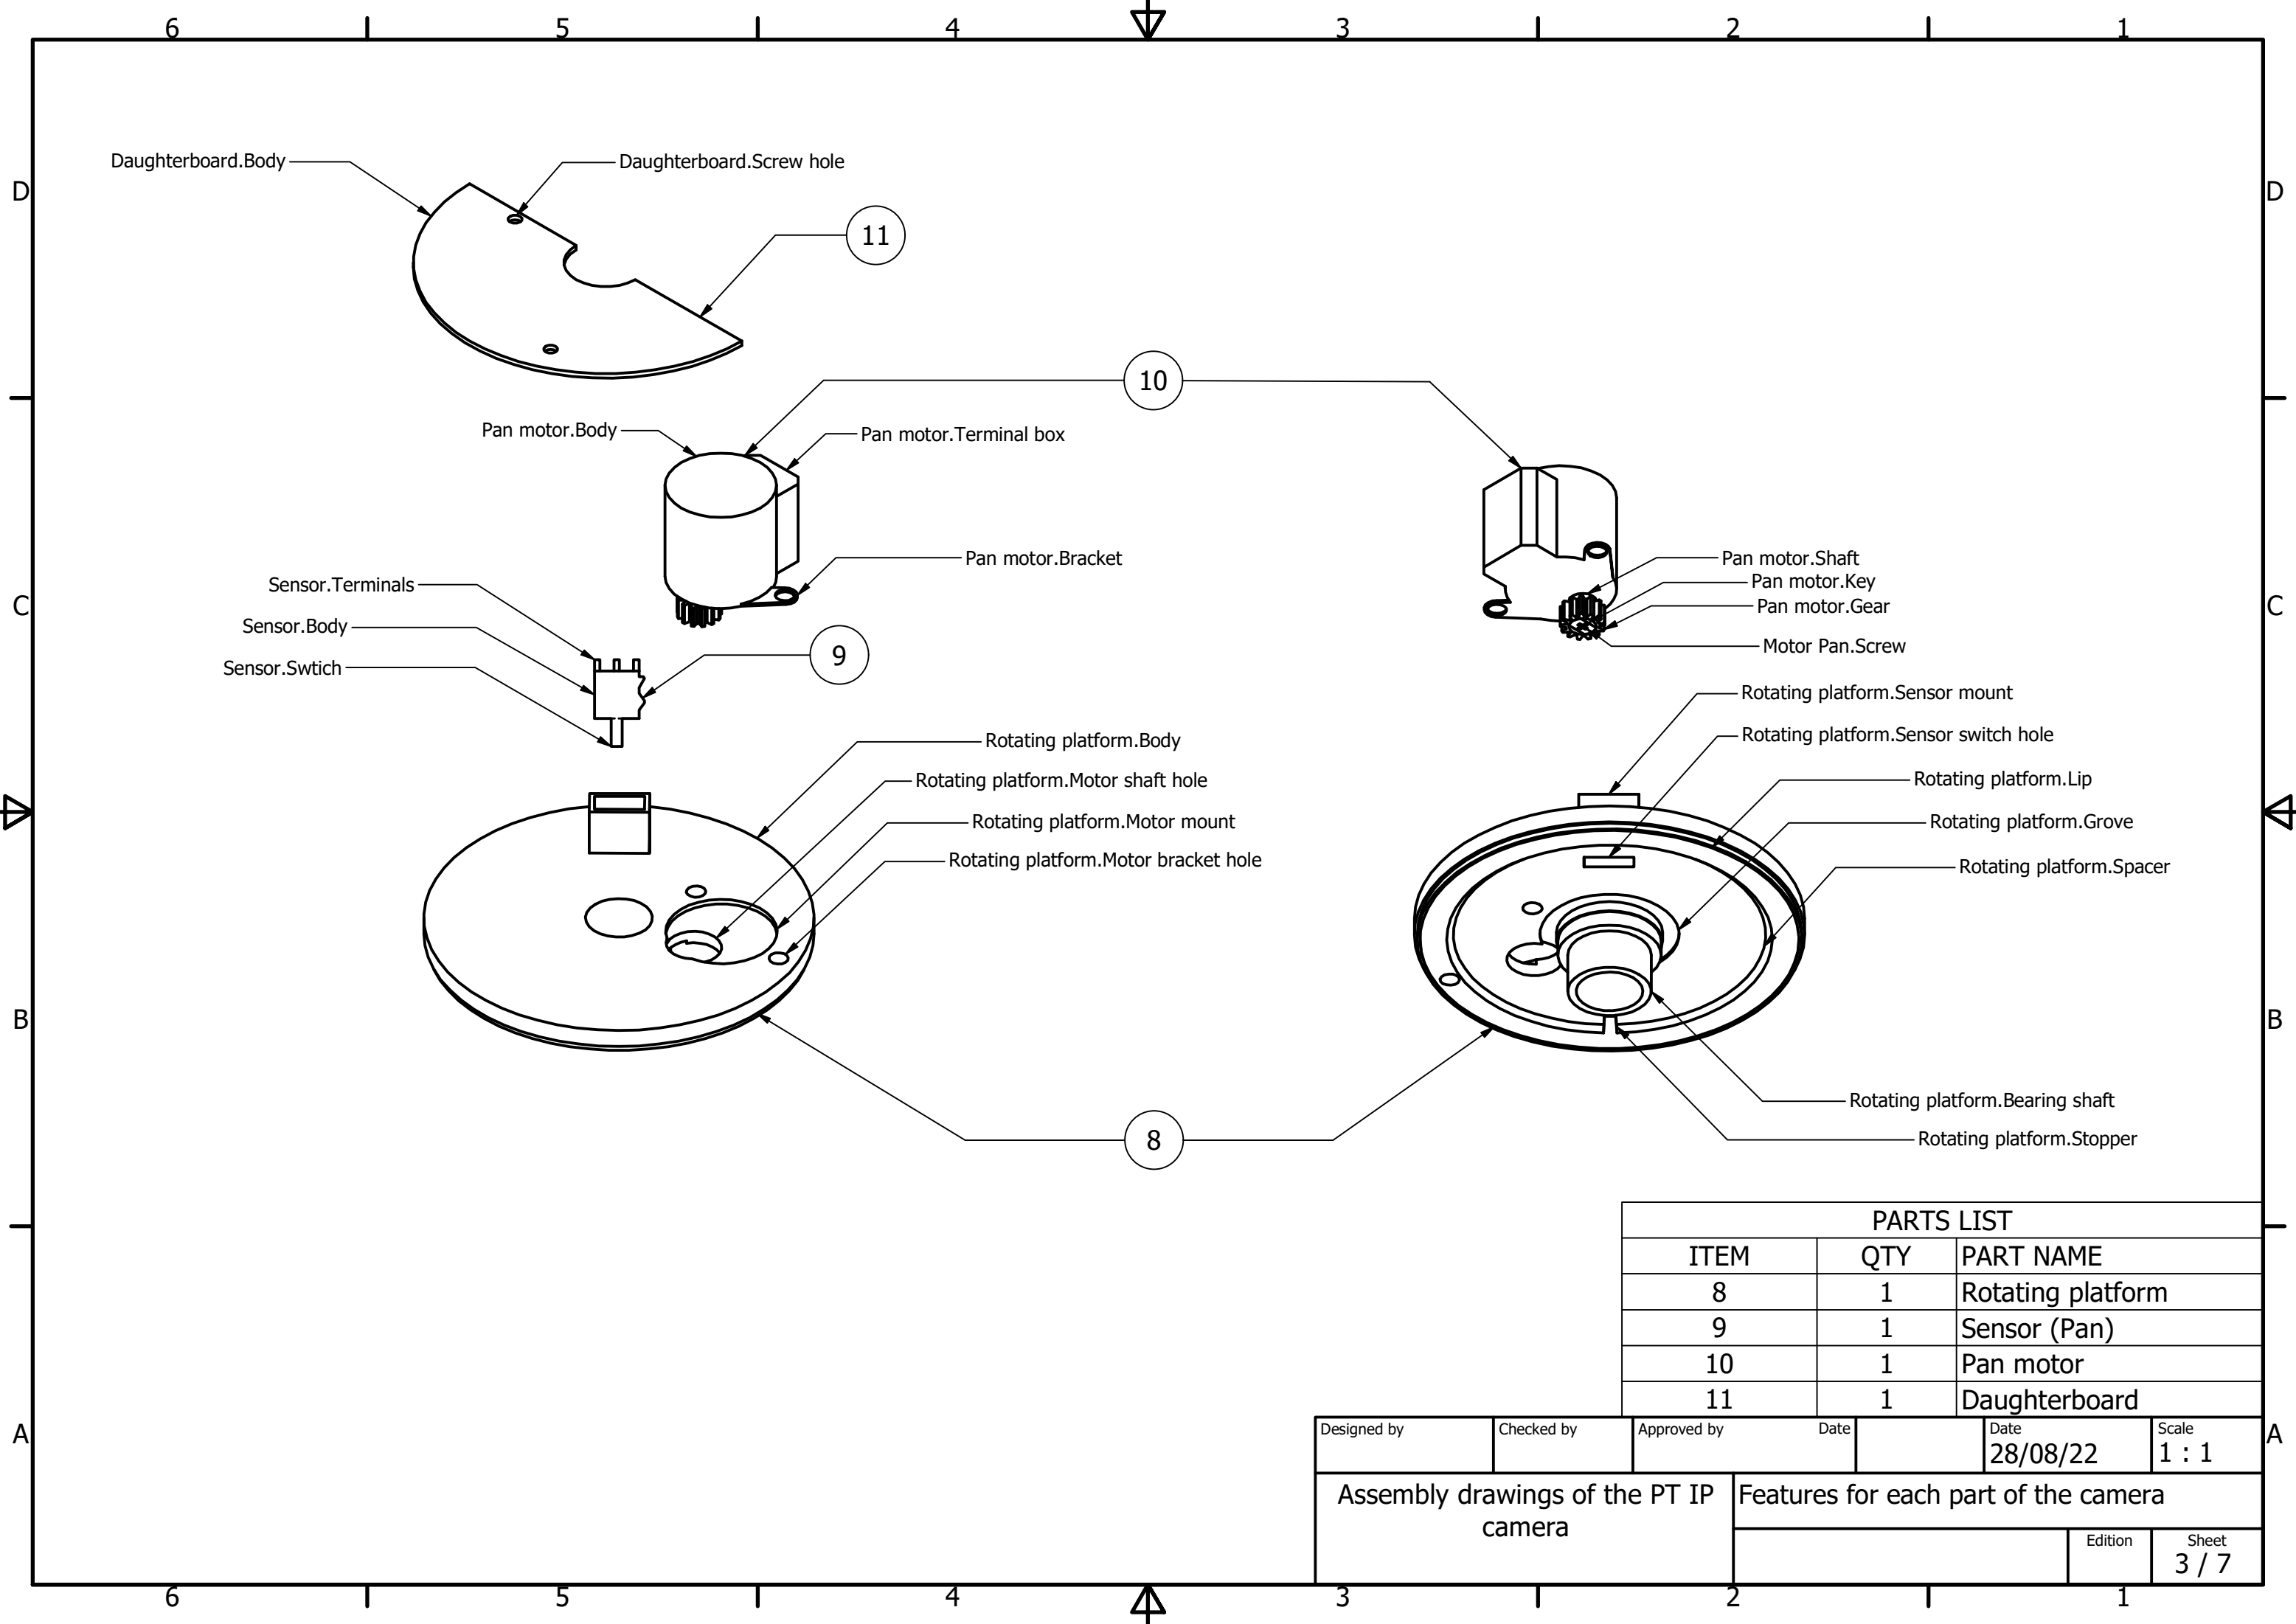

| PARTS LIST |     |                   |
|------------|-----|-------------------|
| ITEM       | QTY | PART NAME         |
| 8          | 1   | Rotating platform |
| 9          | 1   | Sensor (Pan)      |
| 10         | 1   | Pan motor         |
| 11         | 1   | Daughterboard     |

|                                       |            |             |                                      |          |       |
|---------------------------------------|------------|-------------|--------------------------------------|----------|-------|
| Designed by                           | Checked by | Approved by | Date                                 | Date     | Scale |
|                                       |            |             |                                      | 28/08/22 | 1 : 1 |
| Assembly drawings of the PT IP camera |            |             | Features for each part of the camera |          |       |
|                                       |            |             | Edition                              | Sheet    |       |
|                                       |            |             |                                      | 3 / 7    |       |

| PARTS LIST |     |            |
|------------|-----|------------|
| ITEM       | QTY | PART NAME  |
| 12         | 1   | Speaker    |
| 13         | 1   | Tilt base  |
| 14         | 1   | LHS casing |
| 15         | 1   | RHS casing |

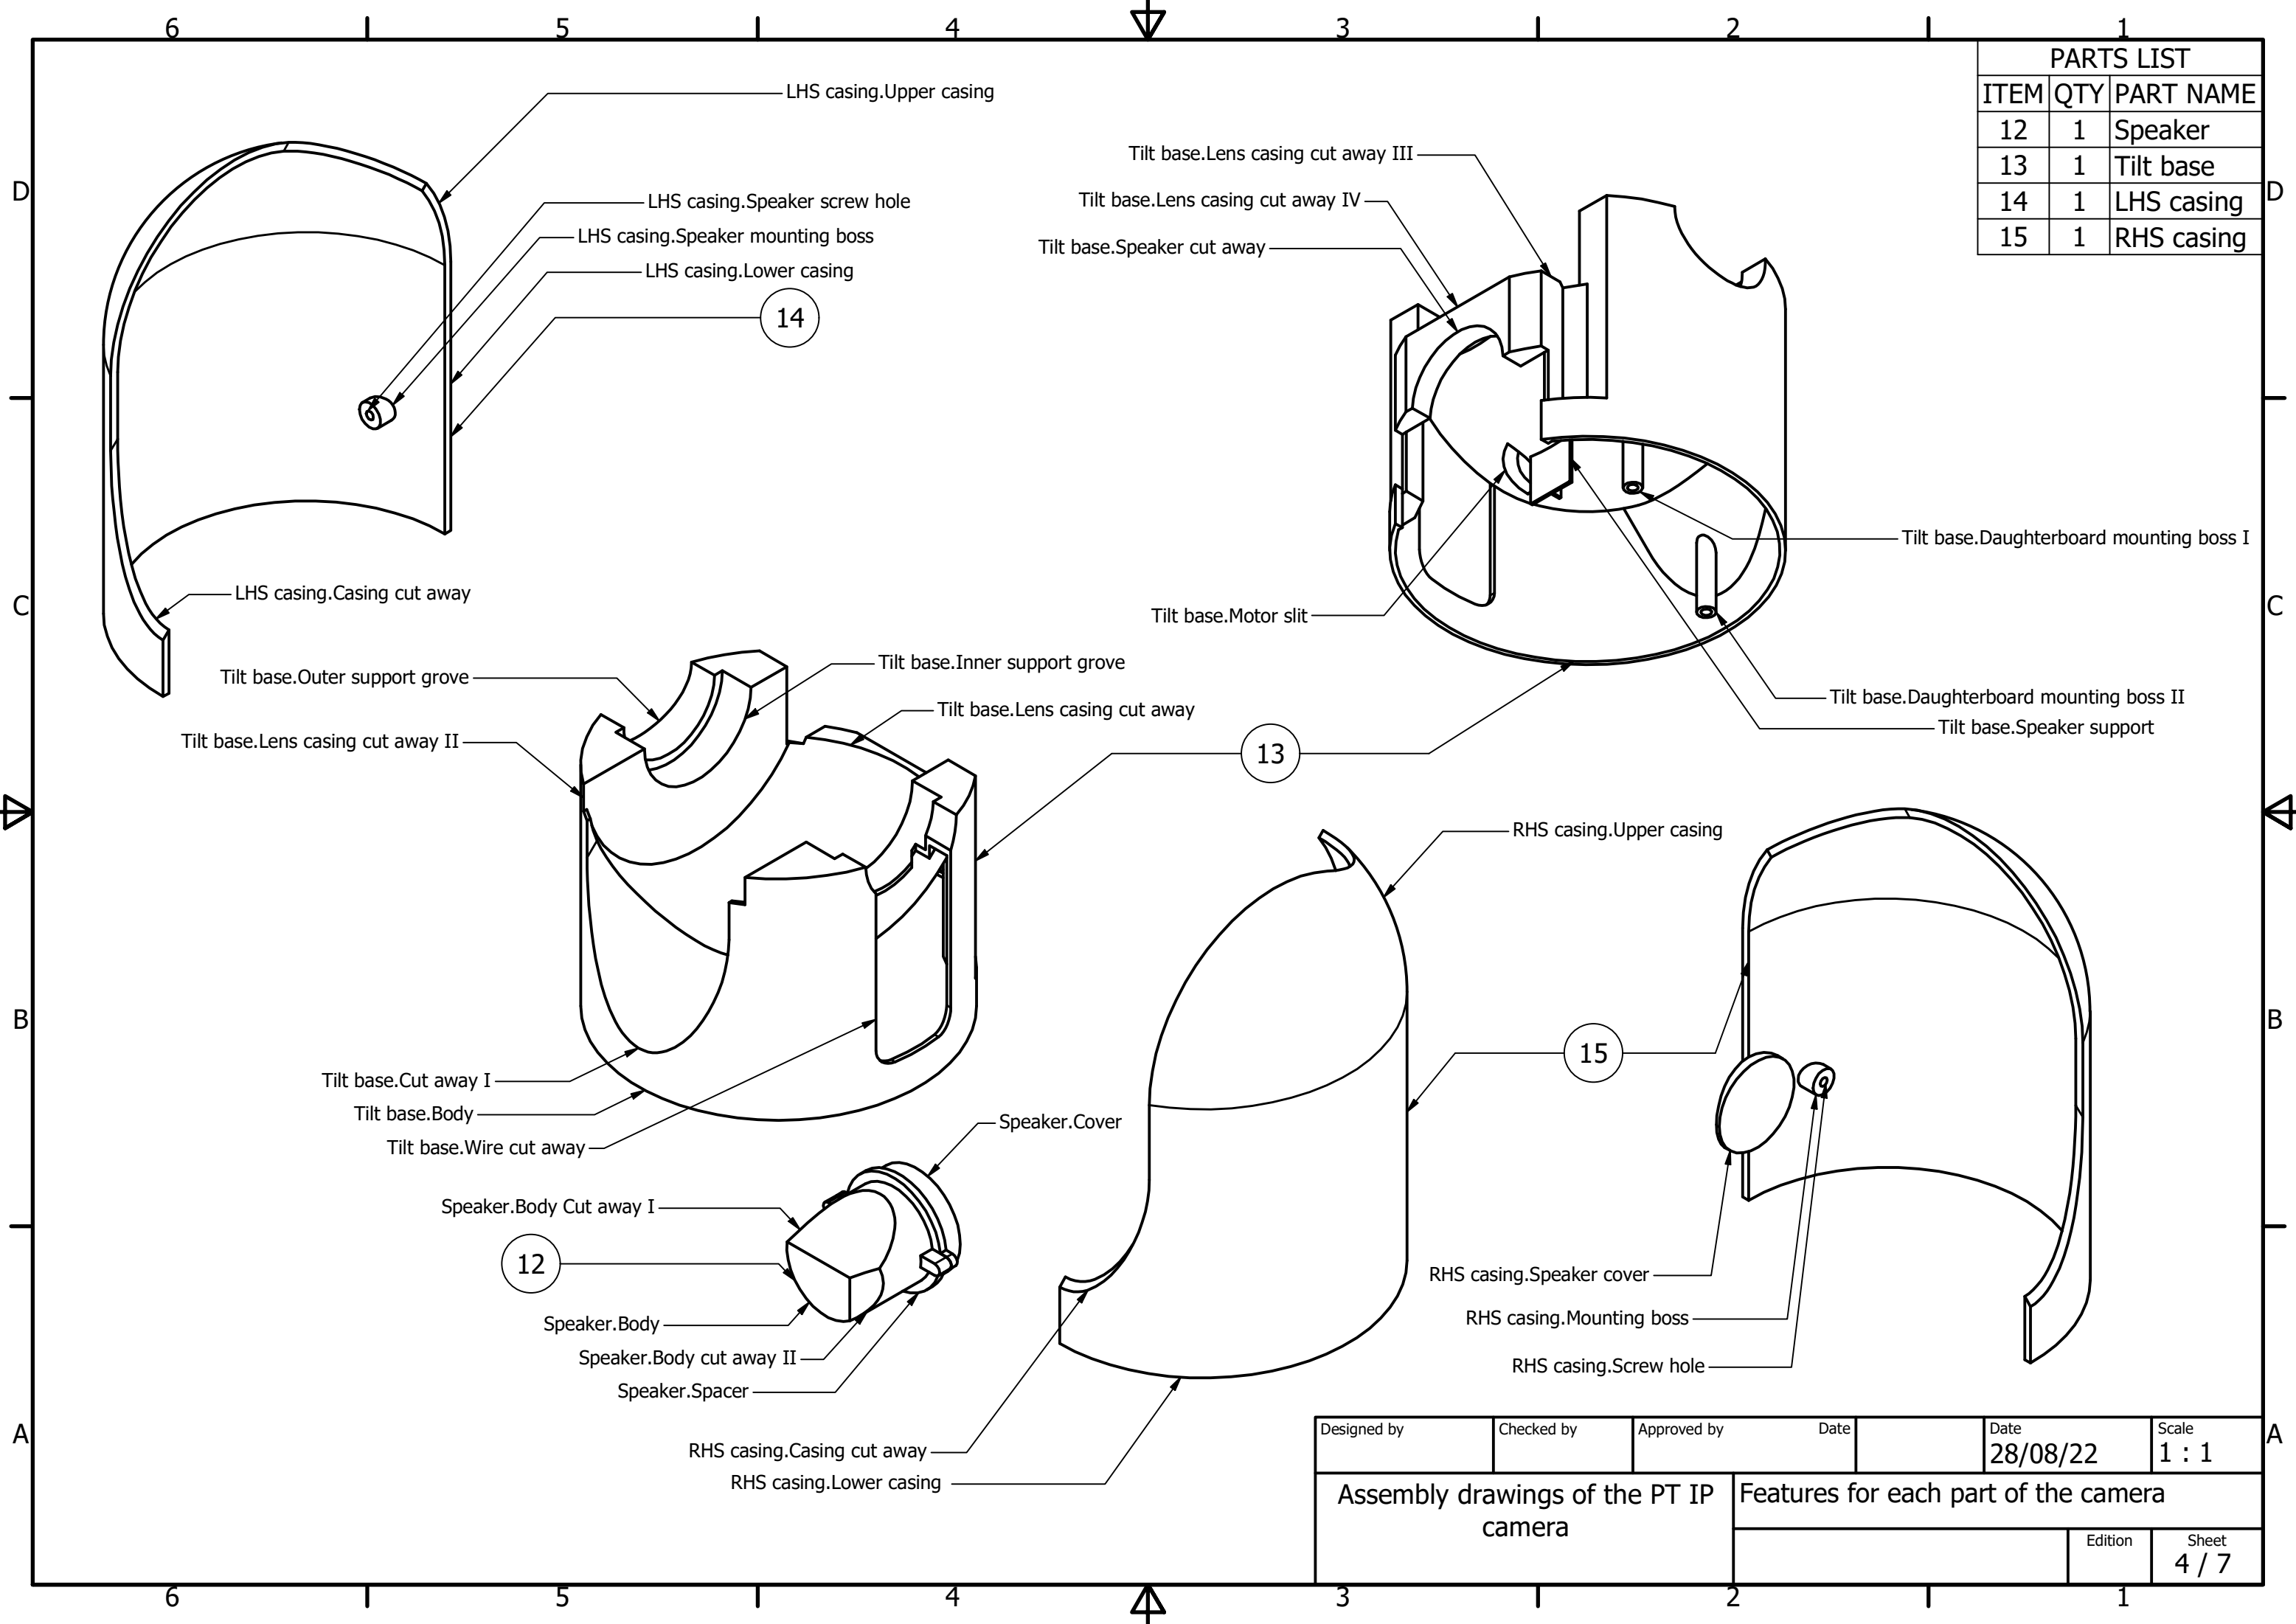

|                                       |            |             |                                      |          |       |
|---------------------------------------|------------|-------------|--------------------------------------|----------|-------|
| Designed by                           | Checked by | Approved by | Date                                 | Date     | Scale |
|                                       |            |             |                                      | 28/08/22 | 1 : 1 |
| Assembly drawings of the PT IP camera |            |             | Features for each part of the camera |          |       |
|                                       |            |             | Edition                              | Sheet    |       |
|                                       |            |             |                                      | 4 / 7    |       |

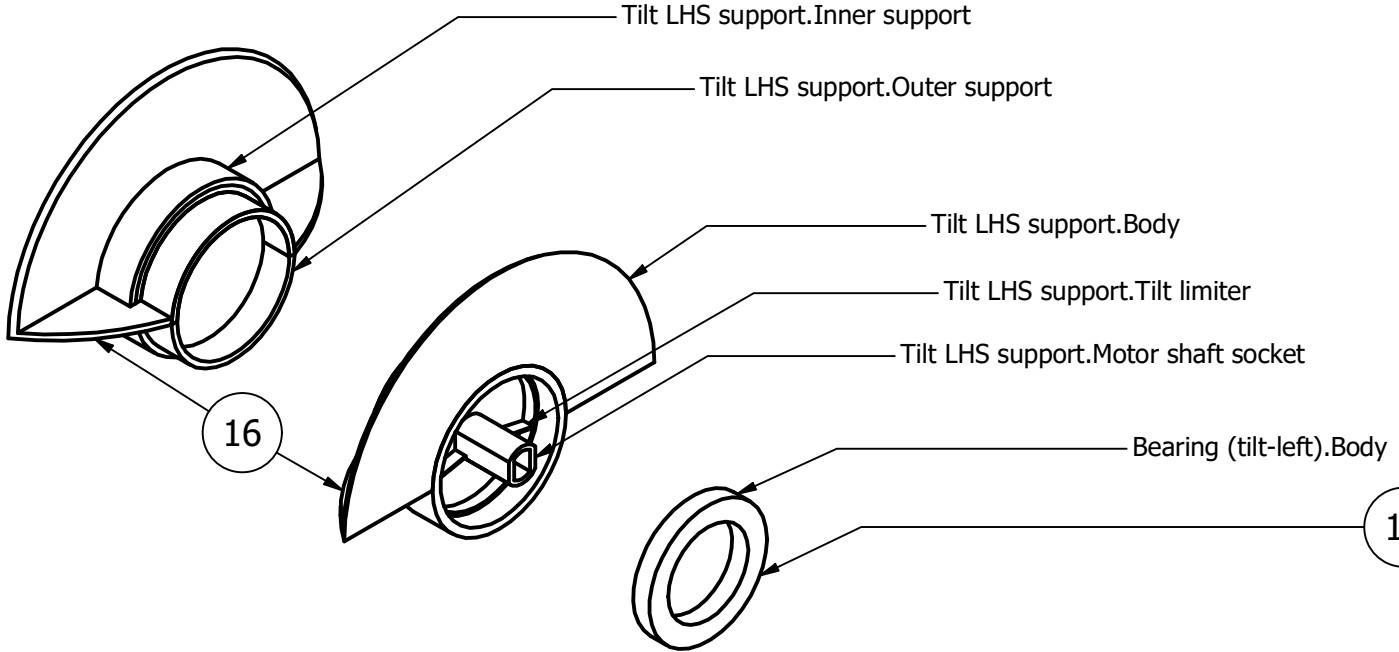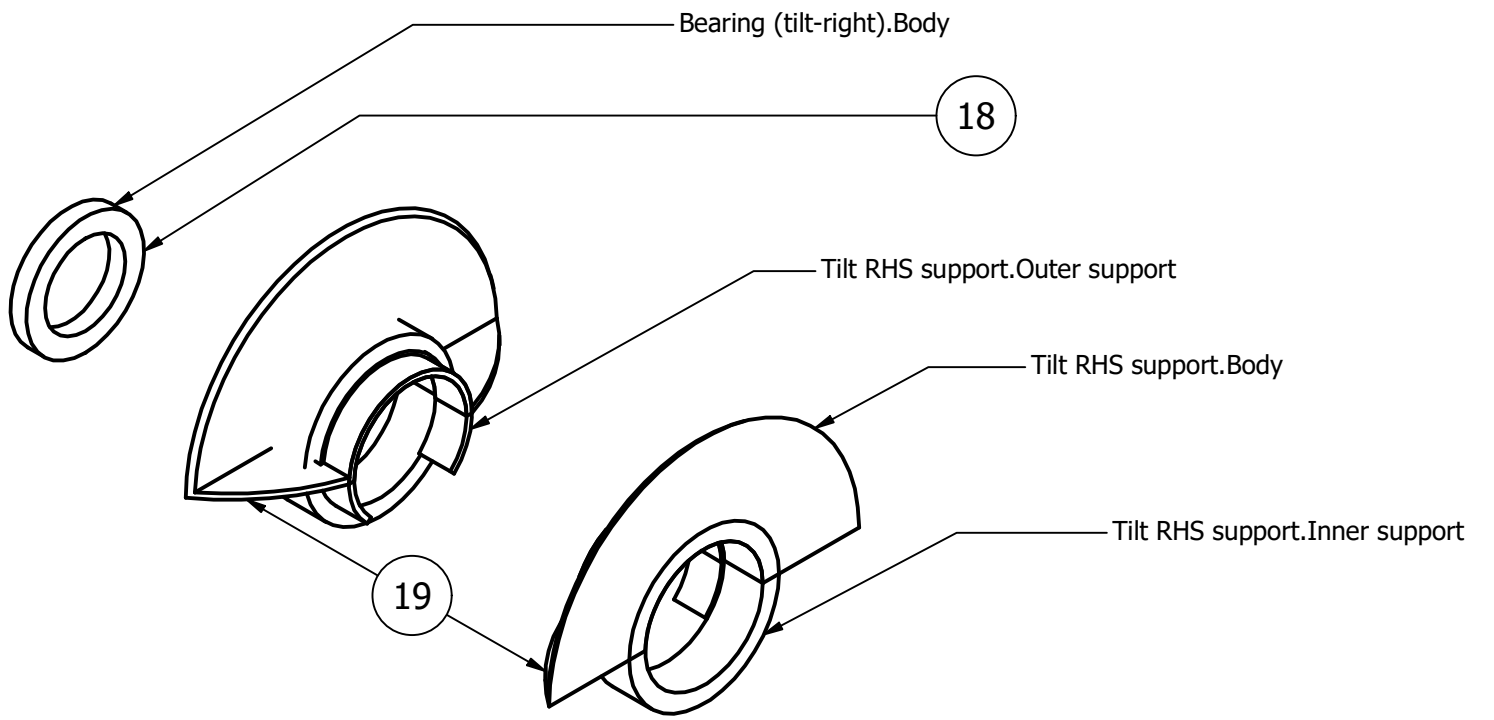

| PARTS LIST |     |                        |
|------------|-----|------------------------|
| ITEM       | QTY | PART NAME              |
| 16         | 1   | LHS casing             |
| 17         | 1   | Bearing (Tilt - left)  |
| 18         | 1   | Bearing (Tilt - right) |
| 19         | 1   | RHS casing             |

|                                       |            |             |                                      |          |       |
|---------------------------------------|------------|-------------|--------------------------------------|----------|-------|
| Designed by                           | Checked by | Approved by | Date                                 | Date     | Scale |
|                                       |            |             |                                      | 28/08/22 | 1 : 1 |
| Assembly drawings of the PT IP camera |            |             | Features for each part of the camera |          |       |
|                                       |            |             | Edition                              | Sheet    |       |
|                                       |            |             |                                      | 5 / 7    |       |

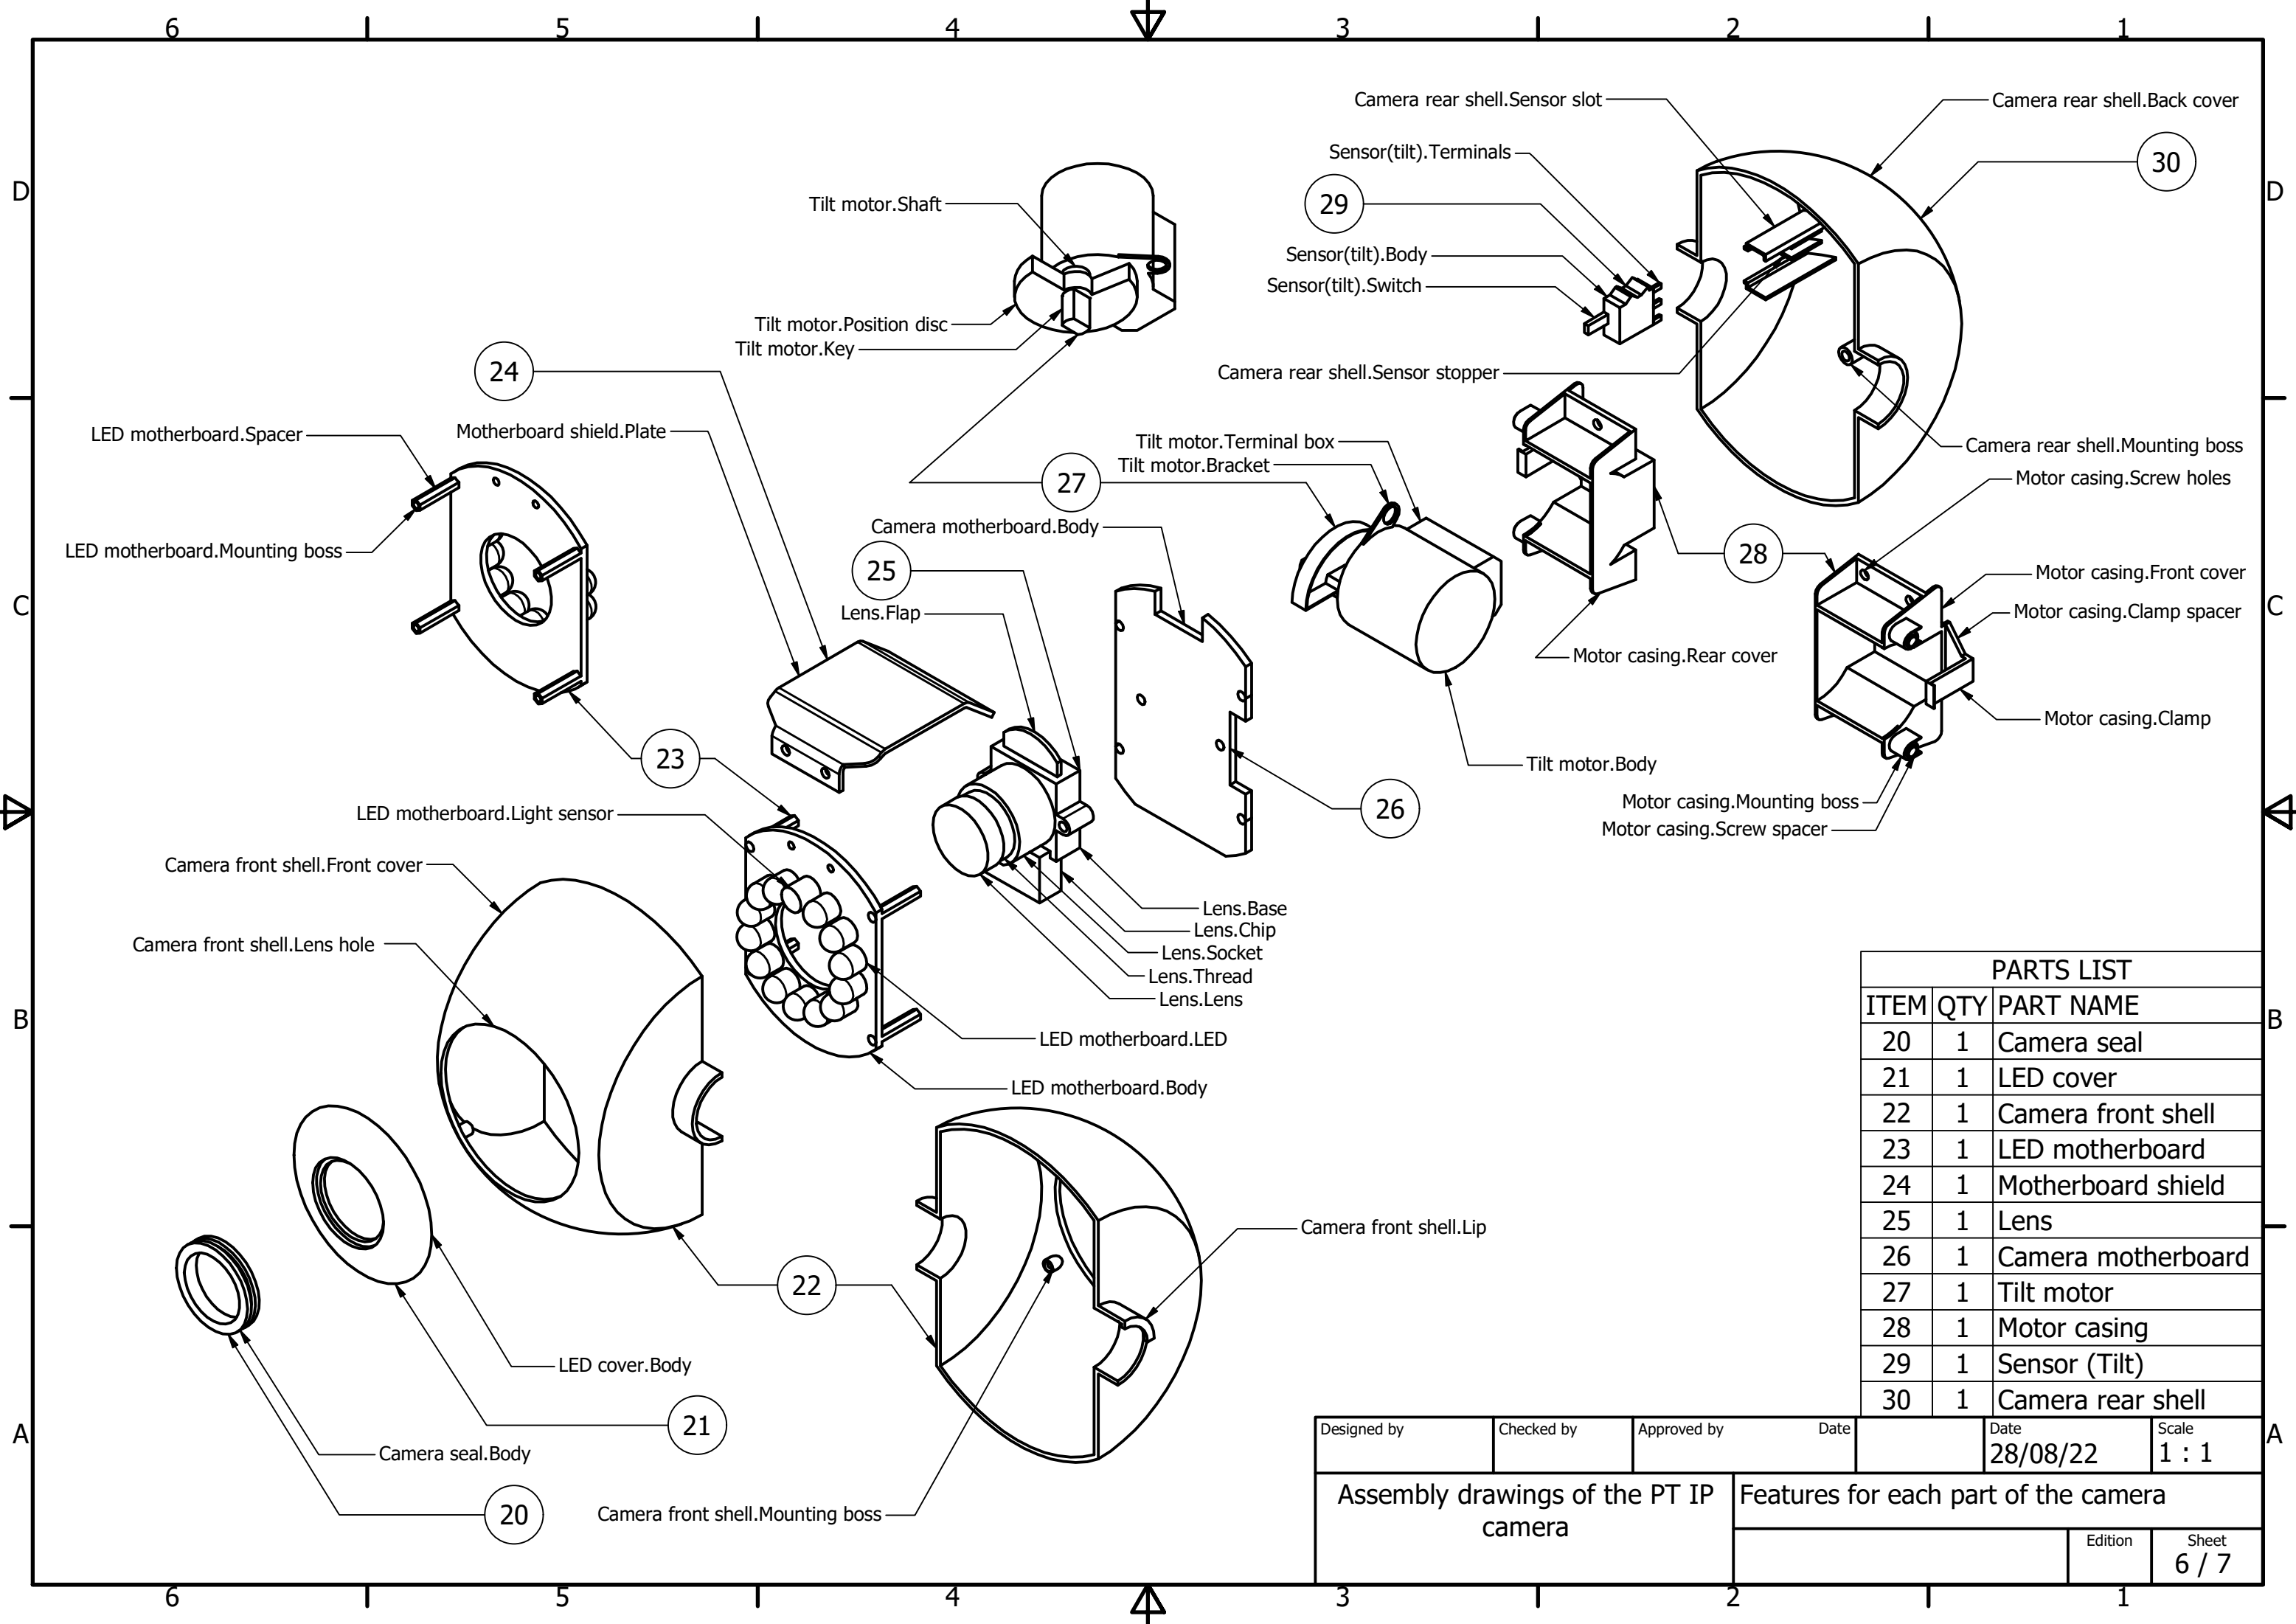

| PARTS LIST |     |                    |
|------------|-----|--------------------|
| ITEM       | QTY | PART NAME          |
| 20         | 1   | Camera seal        |
| 21         | 1   | LED cover          |
| 22         | 1   | Camera front shell |
| 23         | 1   | LED motherboard    |
| 24         | 1   | Motherboard shield |
| 25         | 1   | Lens               |
| 26         | 1   | Camera motherboard |
| 27         | 1   | Tilt motor         |
| 28         | 1   | Motor casing       |
| 29         | 1   | Sensor (Tilt)      |
| 30         | 1   | Camera rear shell  |

|                                       |            |             |                                      |          |       |
|---------------------------------------|------------|-------------|--------------------------------------|----------|-------|
| Designed by                           | Checked by | Approved by | Date                                 | Date     | Scale |
|                                       |            |             |                                      | 28/08/22 | 1 : 1 |
| Assembly drawings of the PT IP camera |            |             | Features for each part of the camera |          |       |
|                                       |            |             | Edition                              | Sheet    |       |
|                                       |            |             |                                      | 6 / 7    |       |



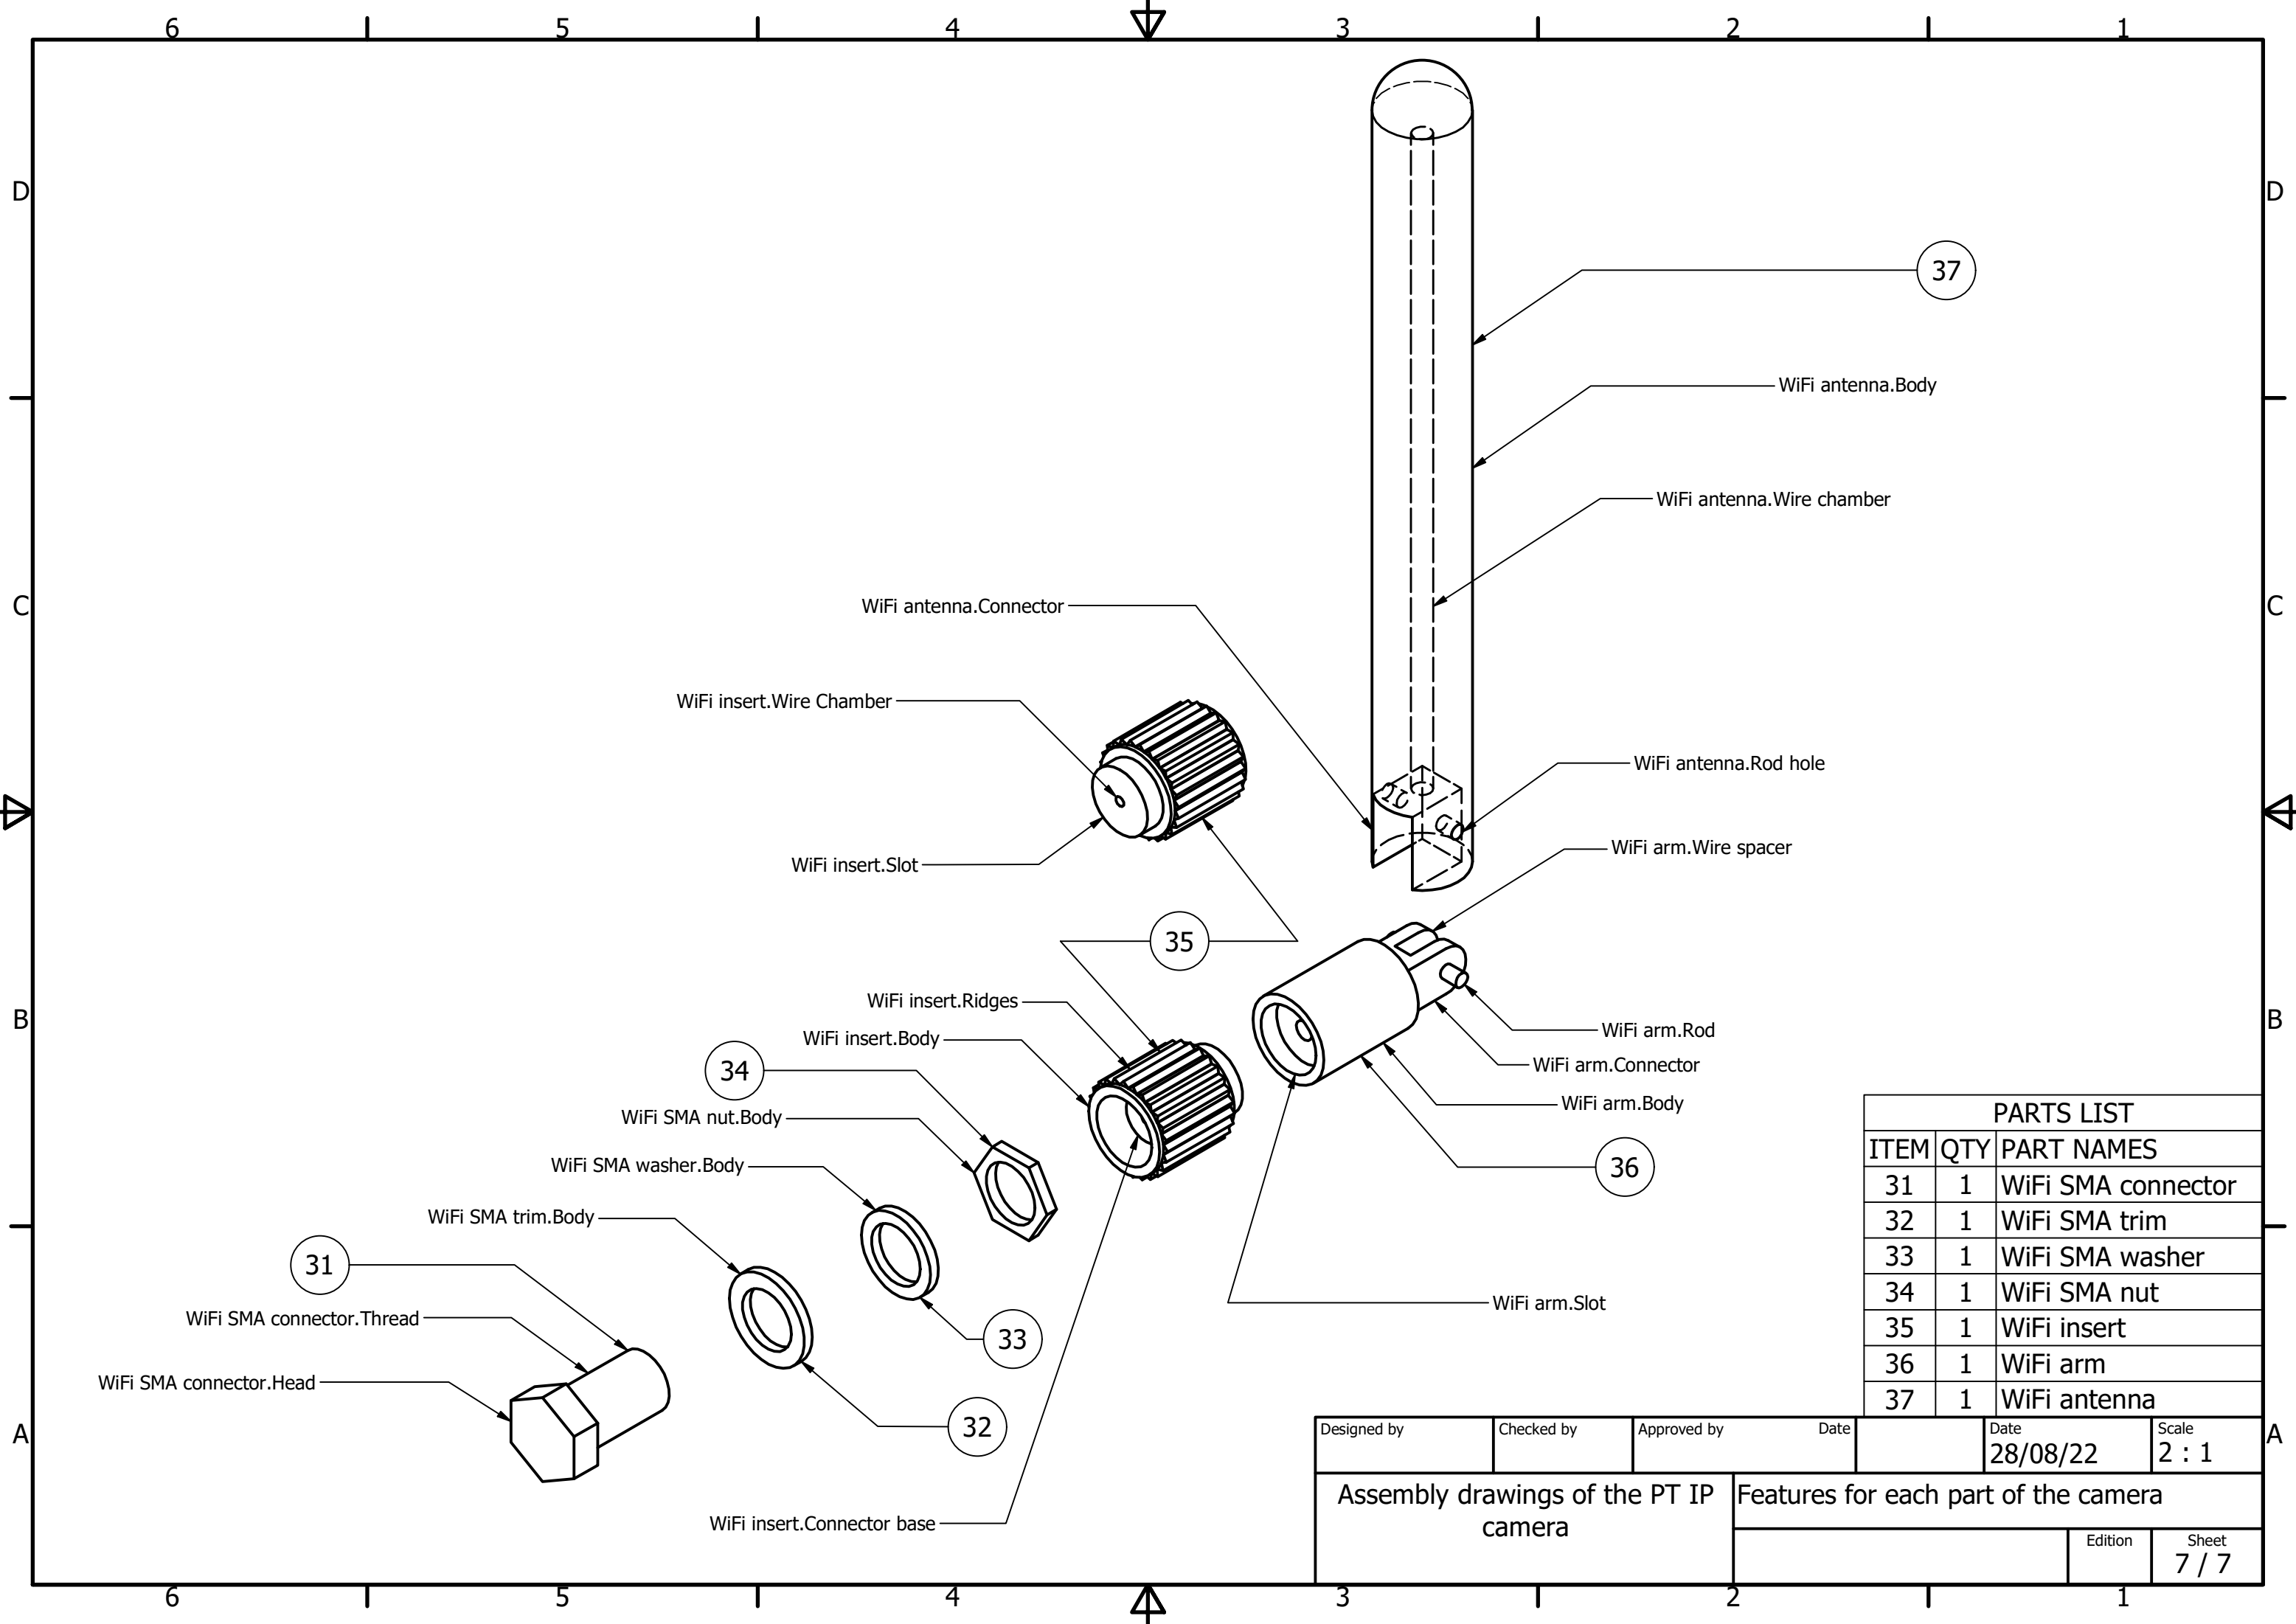

| PARTS LIST |     |                    |
|------------|-----|--------------------|
| ITEM       | QTY | PART NAMES         |
| 31         | 1   | WiFi SMA connector |
| 32         | 1   | WiFi SMA trim      |
| 33         | 1   | WiFi SMA washer    |
| 34         | 1   | WiFi SMA nut       |
| 35         | 1   | WiFi insert        |
| 36         | 1   | WiFi arm           |
| 37         | 1   | WiFi antenna       |

|                                       |            |             |                                      |          |       |
|---------------------------------------|------------|-------------|--------------------------------------|----------|-------|
| Designed by                           | Checked by | Approved by | Date                                 | Date     | Scale |
|                                       |            |             |                                      | 28/08/22 | 2 : 1 |
| Assembly drawings of the PT IP camera |            |             | Features for each part of the camera |          |       |
|                                       |            |             | Edition                              | Sheet    |       |
|                                       |            |             |                                      | 7 / 7    |       |







| Task number | Redesign task | Feature type | Variant Type | Variant Name | Part                  | Feature               | Additional notes                                                                                                                   |
|-------------|---------------|--------------|--------------|--------------|-----------------------|-----------------------|------------------------------------------------------------------------------------------------------------------------------------|
| 1           | Remove        | Uf           | Base         | Fixed camera | Base                  | Body                  | Remove base                                                                                                                        |
| 2           | Remove        | Usf          | Base         | Fixed camera |                       | Inner body            |                                                                                                                                    |
| 3           | Remove        | Usf          | Base         | Fixed camera |                       | Spacer                |                                                                                                                                    |
| 4           | Remove        | Usf          | Base         | Fixed camera |                       | Plate Support         |                                                                                                                                    |
| 5           | Remove        | Usf          | Base         | Fixed camera |                       | Plate Support II      |                                                                                                                                    |
| 6           | Remove        | Uf           | Base         | Fixed camera |                       | Slit                  |                                                                                                                                    |
| 7           | Remove        | Uf           | Base         | Fixed camera |                       | Rail                  |                                                                                                                                    |
| 8           | Remove        | Usf          | Base         | Fixed camera |                       | Rubber Ring           |                                                                                                                                    |
| 9           | Remove        | Uf           | Base         | Fixed camera |                       | Flap                  |                                                                                                                                    |
| 10          | Remove        | Usf          | Base         | Fixed camera |                       | Teeth Support         |                                                                                                                                    |
| 11          | Remove        | Usf          | Base         | Fixed camera |                       | Teeth Spacer          |                                                                                                                                    |
| 12          | Remove        | Uf           | Base         | Fixed camera |                       | Teeth                 |                                                                                                                                    |
| 13          | Retain        | Df           | Base         | Fixed camera | Base cover            | Body                  | Is this feature needed to support the other desired features of the existing base variant?                                         |
| 14          | Retain        | Df           | Base         | Fixed camera |                       | Knuckle               |                                                                                                                                    |
| 15          | Retain        | Df           | Base         | Fixed camera |                       | Knuckle spacer        |                                                                                                                                    |
| 16          | Retain        | Df           | Base         | Fixed camera |                       | Screw socket          |                                                                                                                                    |
| 17          | Examine       | Dsf          | Base         | Fixed camera |                       | Rubber socket         |                                                                                                                                    |
| 18          | Remove        | Uf           | Base         | Fixed camera |                       | Rear lip              |                                                                                                                                    |
| 19          | Remove        | Uf           | Base         | Fixed camera |                       | Right lip             |                                                                                                                                    |
| 20          | Remove        | Uf           | Base         | Fixed camera |                       | Left lip              |                                                                                                                                    |
| 21          | Remove        | Uf           | Base         | Fixed camera |                       | Flap                  |                                                                                                                                    |
| 22          | Remove        | Uf           | Base         | Fixed camera |                       | Teeth                 |                                                                                                                                    |
| 23          | Retain        | Df           | Base         | Fixed camera |                       | Knuckle hole          |                                                                                                                                    |
| 24          | Remove        | Usf          | Base         | Fixed camera | Base plate            | Body                  | Remove base plate                                                                                                                  |
| 25          | Retain        | Df           | Base         | Fixed camera | Bolt I                | Body                  |                                                                                                                                    |
| 26          | Retain        | Df           | Base         | Fixed camera | Bolt II               | Body                  |                                                                                                                                    |
| 27          | Retain        |              | Base         | Fixed camera | Cap I                 | Body                  |                                                                                                                                    |
| 28          | Retain        |              | Base         | Fixed camera | Cap II                | Body                  |                                                                                                                                    |
| 29          | Retain        |              | Base         | Fixed camera | Front cover           | Body                  |                                                                                                                                    |
| 30          | Retain        |              | Base         | Fixed camera |                       | Lip                   |                                                                                                                                    |
| 31          | Retain        |              | Base         | Fixed camera |                       | Holes                 |                                                                                                                                    |
| 32          | Examine       |              | Base         | Fixed camera | LED motherboard       | Body                  | Does this feature meet the desired technical functions from the features of the Camera Motherboard, Daughterboard and Motherboard? |
| 33          | Examine       |              | Base         | Fixed camera |                       | Motion Sensor         | Does this feature meet the desired technical functions from the features of the Camera Motherboard, Daughterboard and Motherboard? |
| 34          | Retain        |              | Base         | Fixed camera |                       | LED holder            |                                                                                                                                    |
| 35          | Retain        |              | Base         | Fixed camera |                       | Light cover           |                                                                                                                                    |
| 36          | Examine       |              | Base         | Fixed camera |                       | LED                   | Does this feature meet the desired technical functions from the features of the Camera Motherboard, Daughterboard and Motherboard? |
| 37          | Examine       |              | Base         | Fixed camera |                       | LED circular          | Does this feature meet the desired technical functions from the features of the Camera Motherboard, Daughterboard and Motherboard? |
| 38          | Retain        |              | Base         | Fixed camera |                       | LED spacer            |                                                                                                                                    |
| 39          | Examine       |              | Base         | Fixed camera |                       | Light sensor          | Does this feature meet the desired technical functions from the features of the Camera Motherboard, Daughterboard and Motherboard? |
| 40          | Examine       |              | Base         | Fixed camera |                       | Status LED            | Does this feature meet the desired technical functions from the features of the Camera Motherboard, Daughterboard and Motherboard? |
| 41          | Examine       |              | Base         | Fixed camera |                       | LAN socket            | Does this feature meet the desired technical functions from the features of the Camera Motherboard, Daughterboard and Motherboard? |
| 42          | Examine       |              | Base         | Fixed camera |                       | Pins                  | Does this feature meet the desired technical functions from the features of the Camera Motherboard, Daughterboard and Motherboard? |
| 43          | Examine       |              | Base         | Fixed camera | Motherboard           | Mainboard             | Does this feature meet the desired technical functions from the features of the Camera Motherboard, Daughterboard and Motherboard? |
| 44          | Retain        |              | Base         | Fixed camera |                       | Spacer                |                                                                                                                                    |
| 45          | Examine       |              | Base         | Fixed camera |                       | Lens base             | Does this feature meet the desired technical functions from the features of the Camera Motherboard, Daughterboard and Motherboard? |
| 46          | Examine       |              | Base         | Fixed camera |                       | Lens                  | Does this feature meet the desired technical functions from the features of the Camera Motherboard, Daughterboard and Motherboard? |
| 47          | Examine       |              | Base         | Fixed camera |                       | Socket                | Does this feature meet the desired technical functions from the features of the Camera Motherboard, Daughterboard and Motherboard? |
| 48          | Retain        | Df           | Base         | Fixed camera | Rear cover            | Body                  | Is this feature needed to support the other desired features of the existing base variant?                                         |
| 49          | Examine       | Dsf          | Base         | Fixed camera |                       | Lip                   |                                                                                                                                    |
| 50          | Examine       | Dsf          | Base         | Fixed camera |                       | SD card plateau       |                                                                                                                                    |
| 51          | Examine       | Dsf          | Base         | Fixed camera |                       | Micro USB plateau     |                                                                                                                                    |
| 52          | Examine       | Dsf          | Base         | Fixed camera |                       | LAN cover socket      |                                                                                                                                    |
| 53          | Examine       | Dsf          | Base         | Fixed camera |                       | LAN slot              |                                                                                                                                    |
| 54          | Retain        | Df           | Base         | Fixed camera |                       | Knuckle               |                                                                                                                                    |
| 55          | Retain        | Df           | Base         | Fixed camera |                       | Knuckle spacer        |                                                                                                                                    |
| 56          | Examine       | Dsf          | Base         | Fixed camera |                       | SD card slot          |                                                                                                                                    |
| 57          | Examine       | Dsf          | Base         | Fixed camera |                       | Micro USB slot        |                                                                                                                                    |
| 58          | Examine       | Dsf          | Base         | Fixed camera |                       | Push button hole      |                                                                                                                                    |
| 59          | Examine       | Dsf          | Base         | Fixed camera |                       | Mounting boss         |                                                                                                                                    |
| 60          | Retain        | Df           | Base         | Fixed camera |                       | Screw socket          |                                                                                                                                    |
| 61          | Examine       | Dsf          | Base         | Fixed camera |                       | Rubber socket         |                                                                                                                                    |
| 62          | Retain        |              | Base         | Fixed camera | Side cover            | Body                  |                                                                                                                                    |
| 63          | Retain        |              | Base         | Fixed camera |                       | Grove                 |                                                                                                                                    |
| 64          | Retain        |              | Base         | Fixed camera |                       | Screw spacers         |                                                                                                                                    |
| 65          | Retain        | Df           | Base         | Fixed camera | Tilt arm              | Plate                 |                                                                                                                                    |
| 66          | Retain        | Df           | Base         | Fixed camera |                       | Knuckles              |                                                                                                                                    |
| 67          | Carry over    | Df           | Source       | PT camera    | Base                  | Base chassis          | Is this feature needed to support the other desired features of the existing base variant?                                         |
| 68          | Examine       | Dsf          | Source       | PT camera    |                       | Socket Panel          |                                                                                                                                    |
| 69          | Examine       | Dsf          | Source       | PT camera    |                       | LAN Panel             |                                                                                                                                    |
| 70          | Examine       | Dsf          | Source       | PT camera    |                       | Motherboard spacer    |                                                                                                                                    |
| 71          | Examine       | Dsf          | Source       | PT camera    |                       | SD card hole          |                                                                                                                                    |
| 72          | Examine       | Dsf          | Source       | PT camera    |                       | WPS button hole       |                                                                                                                                    |
| 73          | Carry over    | Df           | Source       | PT camera    | Base cover            | Plate                 | Is this feature needed to support the other desired features of the existing base variant?                                         |
| 74          | Examine       | Dsf          | Source       | PT camera    |                       | Rim                   |                                                                                                                                    |
| 75          | Examine       | Dsf          | Source       | PT camera    |                       | Inner plate           |                                                                                                                                    |
| 76          | Examine       | Dsf          | Source       | PT camera    |                       | Bearing Holder        |                                                                                                                                    |
| 77          | Carry over    | Df           | Source       | PT camera    |                       | Screw hole            |                                                                                                                                    |
| 78          | Examine       | Dsf          | Source       | PT camera    |                       | Spacer                |                                                                                                                                    |
| 79          | Examine       | Dsf          | Source       | PT camera    |                       | Mounting boss         |                                                                                                                                    |
| 80          | Examine       | Dsf          | Source       | PT camera    |                       | Holes                 |                                                                                                                                    |
| 81          | Carry over    | Df           | Source       | PT camera    |                       | Sensor stopper        |                                                                                                                                    |
| 82          | Carry over    | Df           | Source       | PT camera    |                       | Platform stopper      |                                                                                                                                    |
| 83          | Carry over    | Df           | Source       | PT camera    |                       | Bearing (Pan)         |                                                                                                                                    |
| 84          | Examine       | Dsf          | Source       | PT camera    | Bearing Cover         | Base plate            | Is this feature needed to support the other desired features of the existing base variant?                                         |
| 85          | Carry over    | Df           | Source       | PT camera    |                       | Gear                  |                                                                                                                                    |
| 86          | Examine       | Dsf          | Source       | PT camera    |                       | Screw holes           |                                                                                                                                    |
| 87          | Carry over    | Df           | Source       | PT camera    | LHS casing            | Lower casing          | Is this feature needed to support the other desired features of the existing base variant?                                         |
| 88          | Examine       | Dsf          | Source       | PT camera    |                       | Upper casing          |                                                                                                                                    |
| 89          | Examine       | Dsf          | Source       | PT camera    |                       | Casing cut away       |                                                                                                                                    |
| 90          | Examine       | Dsf          | Source       | PT camera    |                       | Speaker mounting boss |                                                                                                                                    |
| 91          | Examine       | Dsf          | Source       | PT camera    |                       | Speaker screw hole    |                                                                                                                                    |
| 92          | Carry over    | Df           | Source       | PT camera    | Daughter board        | Body                  | Is this feature needed to support the other desired features of the existing base variant?                                         |
| 93          | Examine       | Dsf          | Source       | PT camera    |                       | Screw holes           |                                                                                                                                    |
| 94          | Carry over    | Df           | Source       | PT camera    | Nut                   | Outer ring            | Carry over Nut                                                                                                                     |
| 95          | Carry over    | Df           | Source       | PT camera    |                       | Inner ring            |                                                                                                                                    |
| 96          | Examine       | Dsf          | Source       | PT camera    | Pan motor             | Body                  | Is this feature needed to support the other desired features of the existing base variant?                                         |
| 97          | Carry over    | Df           | Source       | PT camera    |                       | Terminal box          |                                                                                                                                    |
| 98          | Carry over    | Df           | Source       | PT camera    |                       | Shaft                 |                                                                                                                                    |
| 99          | Carry over    | Df           | Source       | PT camera    |                       | Key                   |                                                                                                                                    |
| 100         | Examine       | Dsf          | Source       | PT camera    |                       | Bracket               |                                                                                                                                    |
| 101         | Carry over    | Df           | Source       | PT camera    |                       | Gear                  |                                                                                                                                    |
| 102         | Carry over    | Df           | Source       | PT camera    |                       | Screw                 |                                                                                                                                    |
| 103         | Carry over    | Df           | Source       | PT camera    |                       | RHS casing            |                                                                                                                                    |
| 104         | Examine       | Dsf          | Source       | PT camera    | Upper casing          |                       |                                                                                                                                    |
| 105         | Examine       | Dsf          | Source       | PT camera    | Casing cut away       |                       |                                                                                                                                    |
| 106         | Examine       | Dsf          | Source       | PT camera    | Speaker mounting boss |                       |                                                                                                                                    |
| 107         | Examine       | Dsf          | Source       | PT camera    | Speaker screw hole    |                       |                                                                                                                                    |
| 108         | Examine       | Dsf          | Source       | PT camera    | Speaker cover         |                       |                                                                                                                                    |
| 109         | Examine       | Dsf          | Source       | PT camera    | Rotating platform     | Spacer                | Is this feature needed to support the other desired features of the existing base variant?                                         |
| 110         | Carry over    | Df           | Source       | PT camera    |                       | Lip                   |                                                                                                                                    |
| 111         | Carry over    | Df           | Source       | PT camera    |                       | Grove                 |                                                                                                                                    |
| 112         | Examine       | Dsf          | Source       | PT camera    |                       | Motor shaft hole      |                                                                                                                                    |
| 113         | Carry over    | Df           | Source       | PT camera    |                       | Bearing shaft         |                                                                                                                                    |
| 114         | Carry over    | Df           | Source       | PT camera    |                       | Stopper               |                                                                                                                                    |
| 115         | Examine       | Dsf          | Source       | PT camera    |                       | Sensor switch hole    |                                                                                                                                    |
| 116         | Examine       | Dsf          | Source       | PT camera    |                       | Sensor mount          |                                                                                                                                    |
| 117         | Examine       | Dsf          | Source       | PT camera    |                       | Motor mount           |                                                                                                                                    |
| 118         | Examine       | Dsf          | Source       | PT camera    |                       | Motor bracket hole    |                                                                                                                                    |
| 119         | Examine       | Dsf          | Source       | PT camera    | Sensor (Pan)          | Body                  | Is this feature needed to support the other desired features of the existing base variant?                                         |
| 120         | Carry over    | Df           | Source       | PT camera    |                       | Switch                |                                                                                                                                    |
| 121         | Examine       | Dsf          | Source       | PT camera    |                       | Terminals             |                                                                                                                                    |

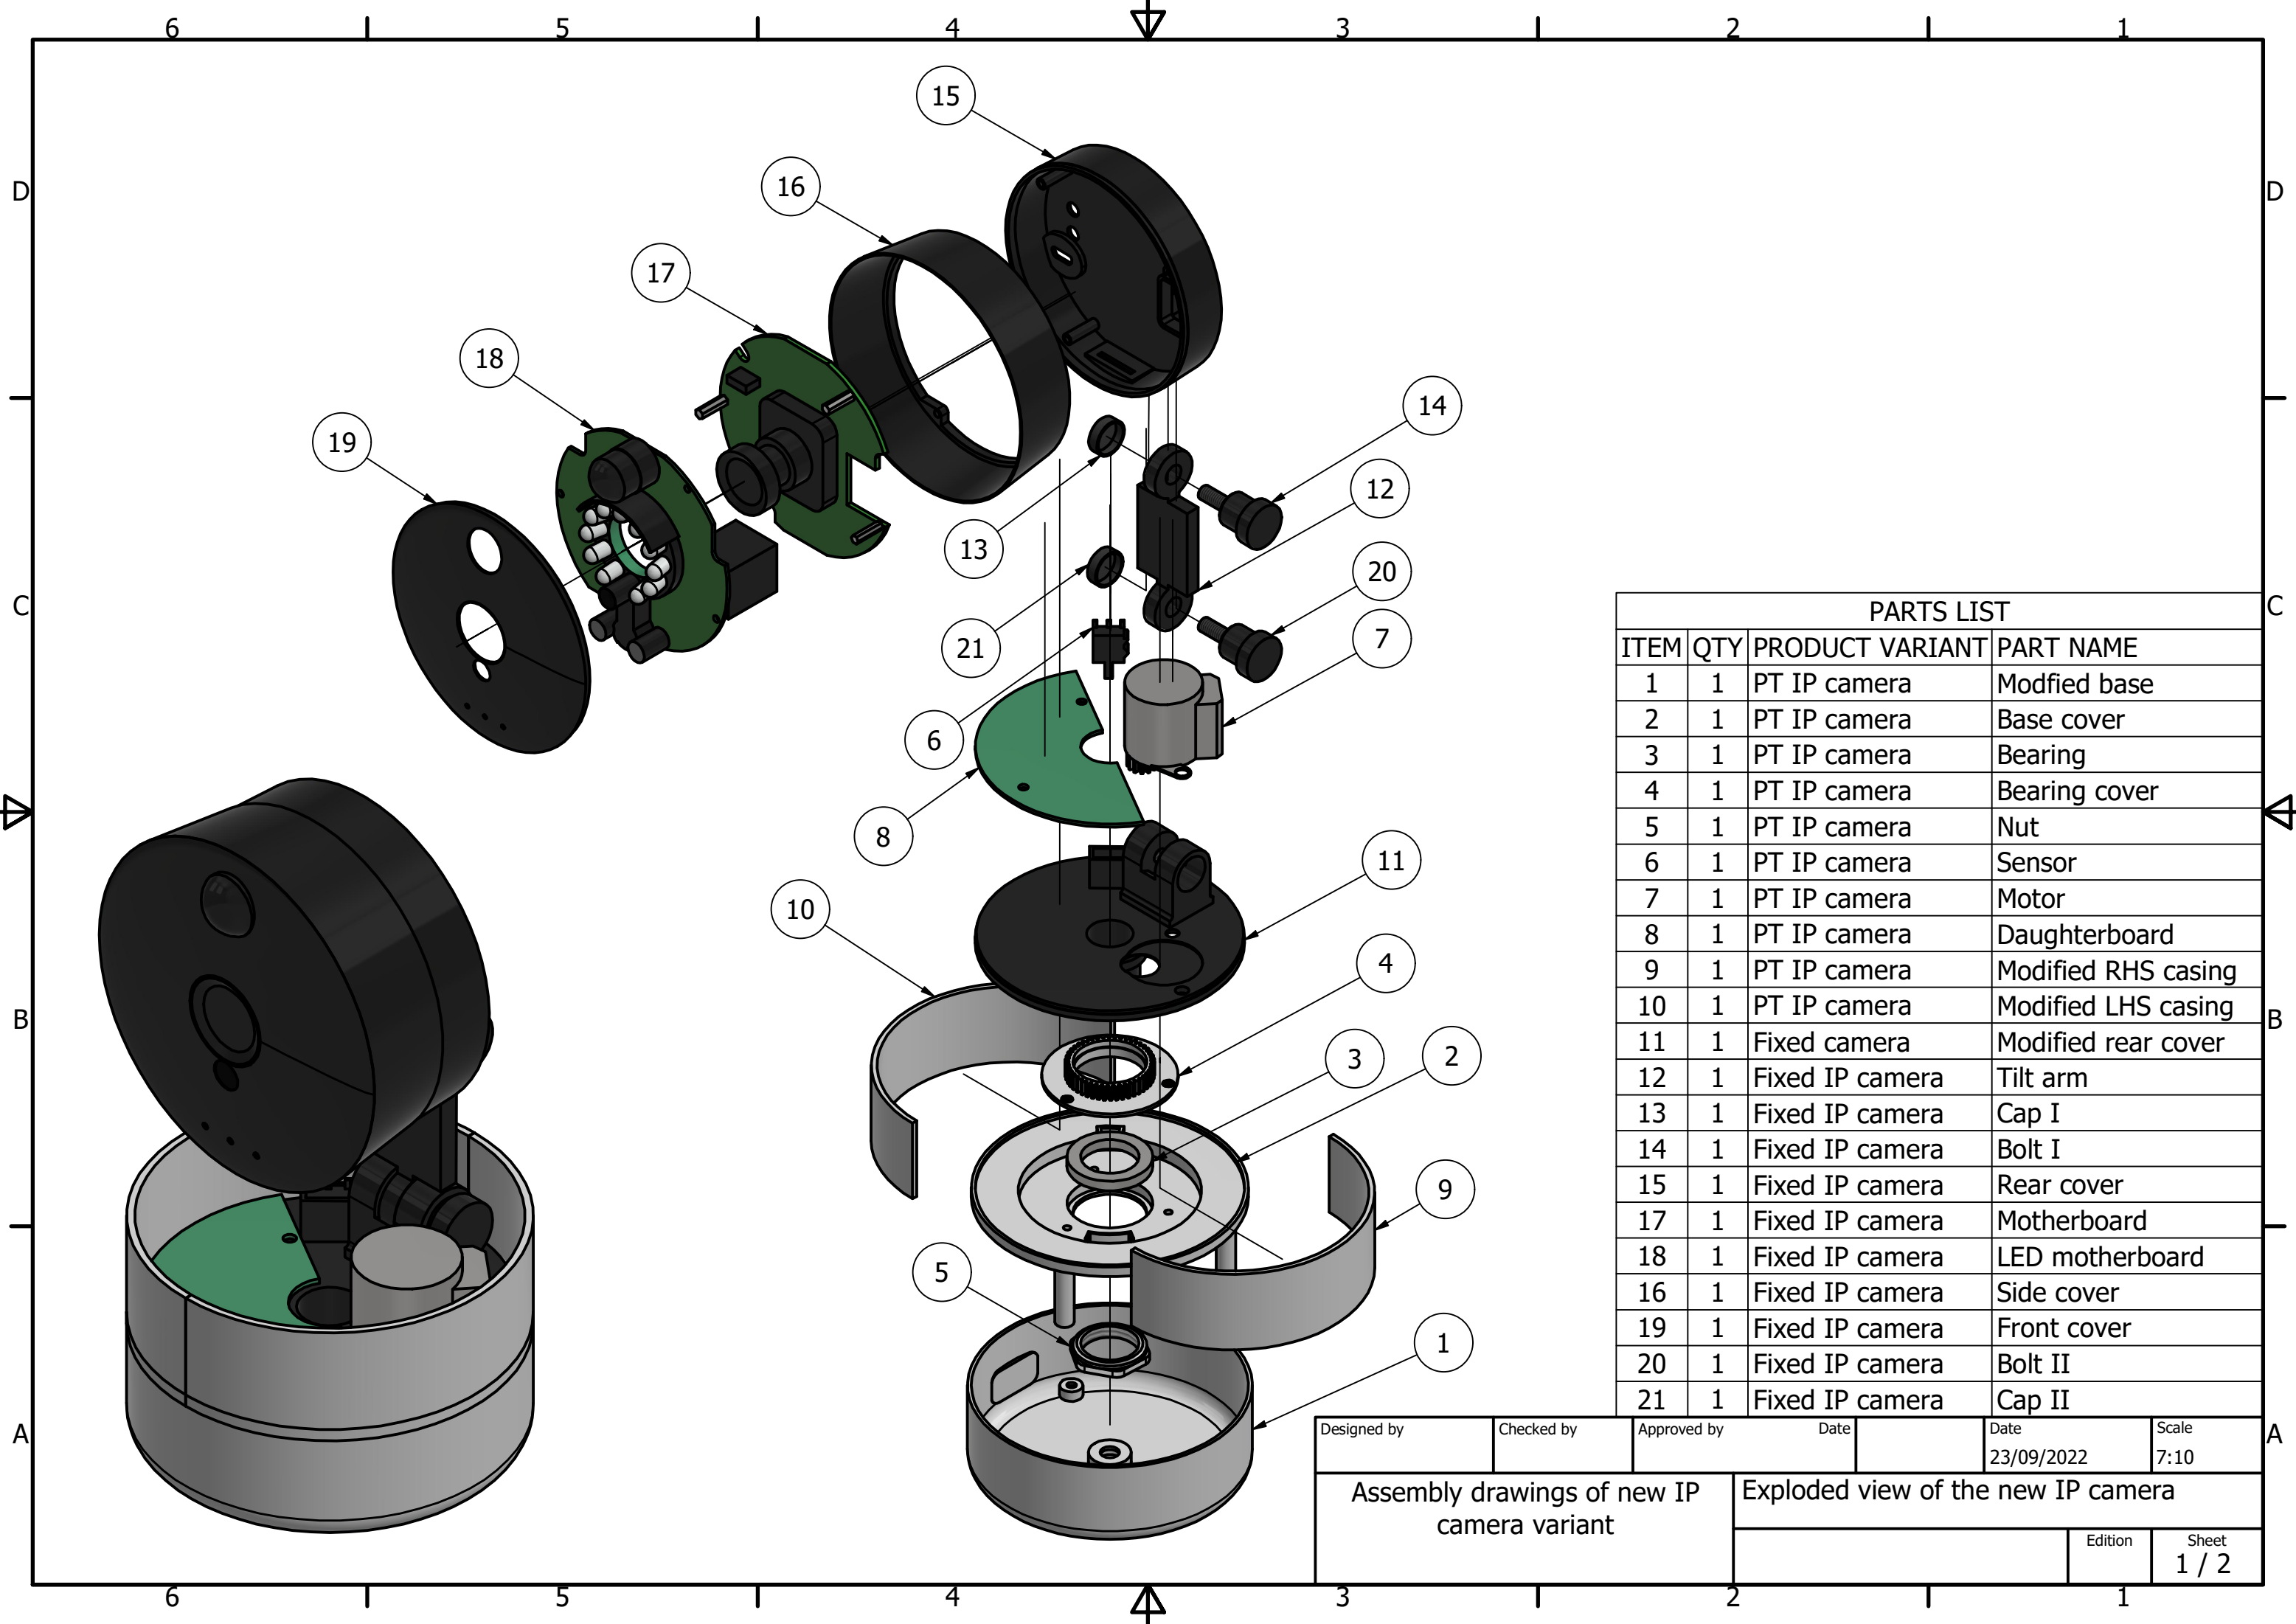

| PARTS LIST |     |                 |                     |
|------------|-----|-----------------|---------------------|
| ITEM       | QTY | PRODUCT VARIANT | PART NAME           |
| 1          | 1   | PT IP camera    | Modified base       |
| 2          | 1   | PT IP camera    | Base cover          |
| 3          | 1   | PT IP camera    | Bearing             |
| 4          | 1   | PT IP camera    | Bearing cover       |
| 5          | 1   | PT IP camera    | Nut                 |
| 6          | 1   | PT IP camera    | Sensor              |
| 7          | 1   | PT IP camera    | Motor               |
| 8          | 1   | PT IP camera    | Daughterboard       |
| 9          | 1   | PT IP camera    | Modified RHS casing |
| 10         | 1   | PT IP camera    | Modified LHS casing |
| 11         | 1   | Fixed camera    | Modified rear cover |
| 12         | 1   | Fixed IP camera | Tilt arm            |
| 13         | 1   | Fixed IP camera | Cap I               |
| 14         | 1   | Fixed IP camera | Bolt I              |
| 15         | 1   | Fixed IP camera | Rear cover          |
| 17         | 1   | Fixed IP camera | Motherboard         |
| 18         | 1   | Fixed IP camera | LED motherboard     |
| 16         | 1   | Fixed IP camera | Side cover          |
| 19         | 1   | Fixed IP camera | Front cover         |
| 20         | 1   | Fixed IP camera | Bolt II             |
| 21         | 1   | Fixed IP camera | Cap II              |

|                                            |            |             |                                    |            |       |
|--------------------------------------------|------------|-------------|------------------------------------|------------|-------|
| Designed by                                | Checked by | Approved by | Date                               | Date       | Scale |
|                                            |            |             |                                    | 23/09/2022 | 7:10  |
| Assembly drawings of new IP camera variant |            |             | Exploded view of the new IP camera |            |       |
|                                            |            |             | Edition                            | Sheet      |       |
|                                            |            |             |                                    | 1 / 2      |       |

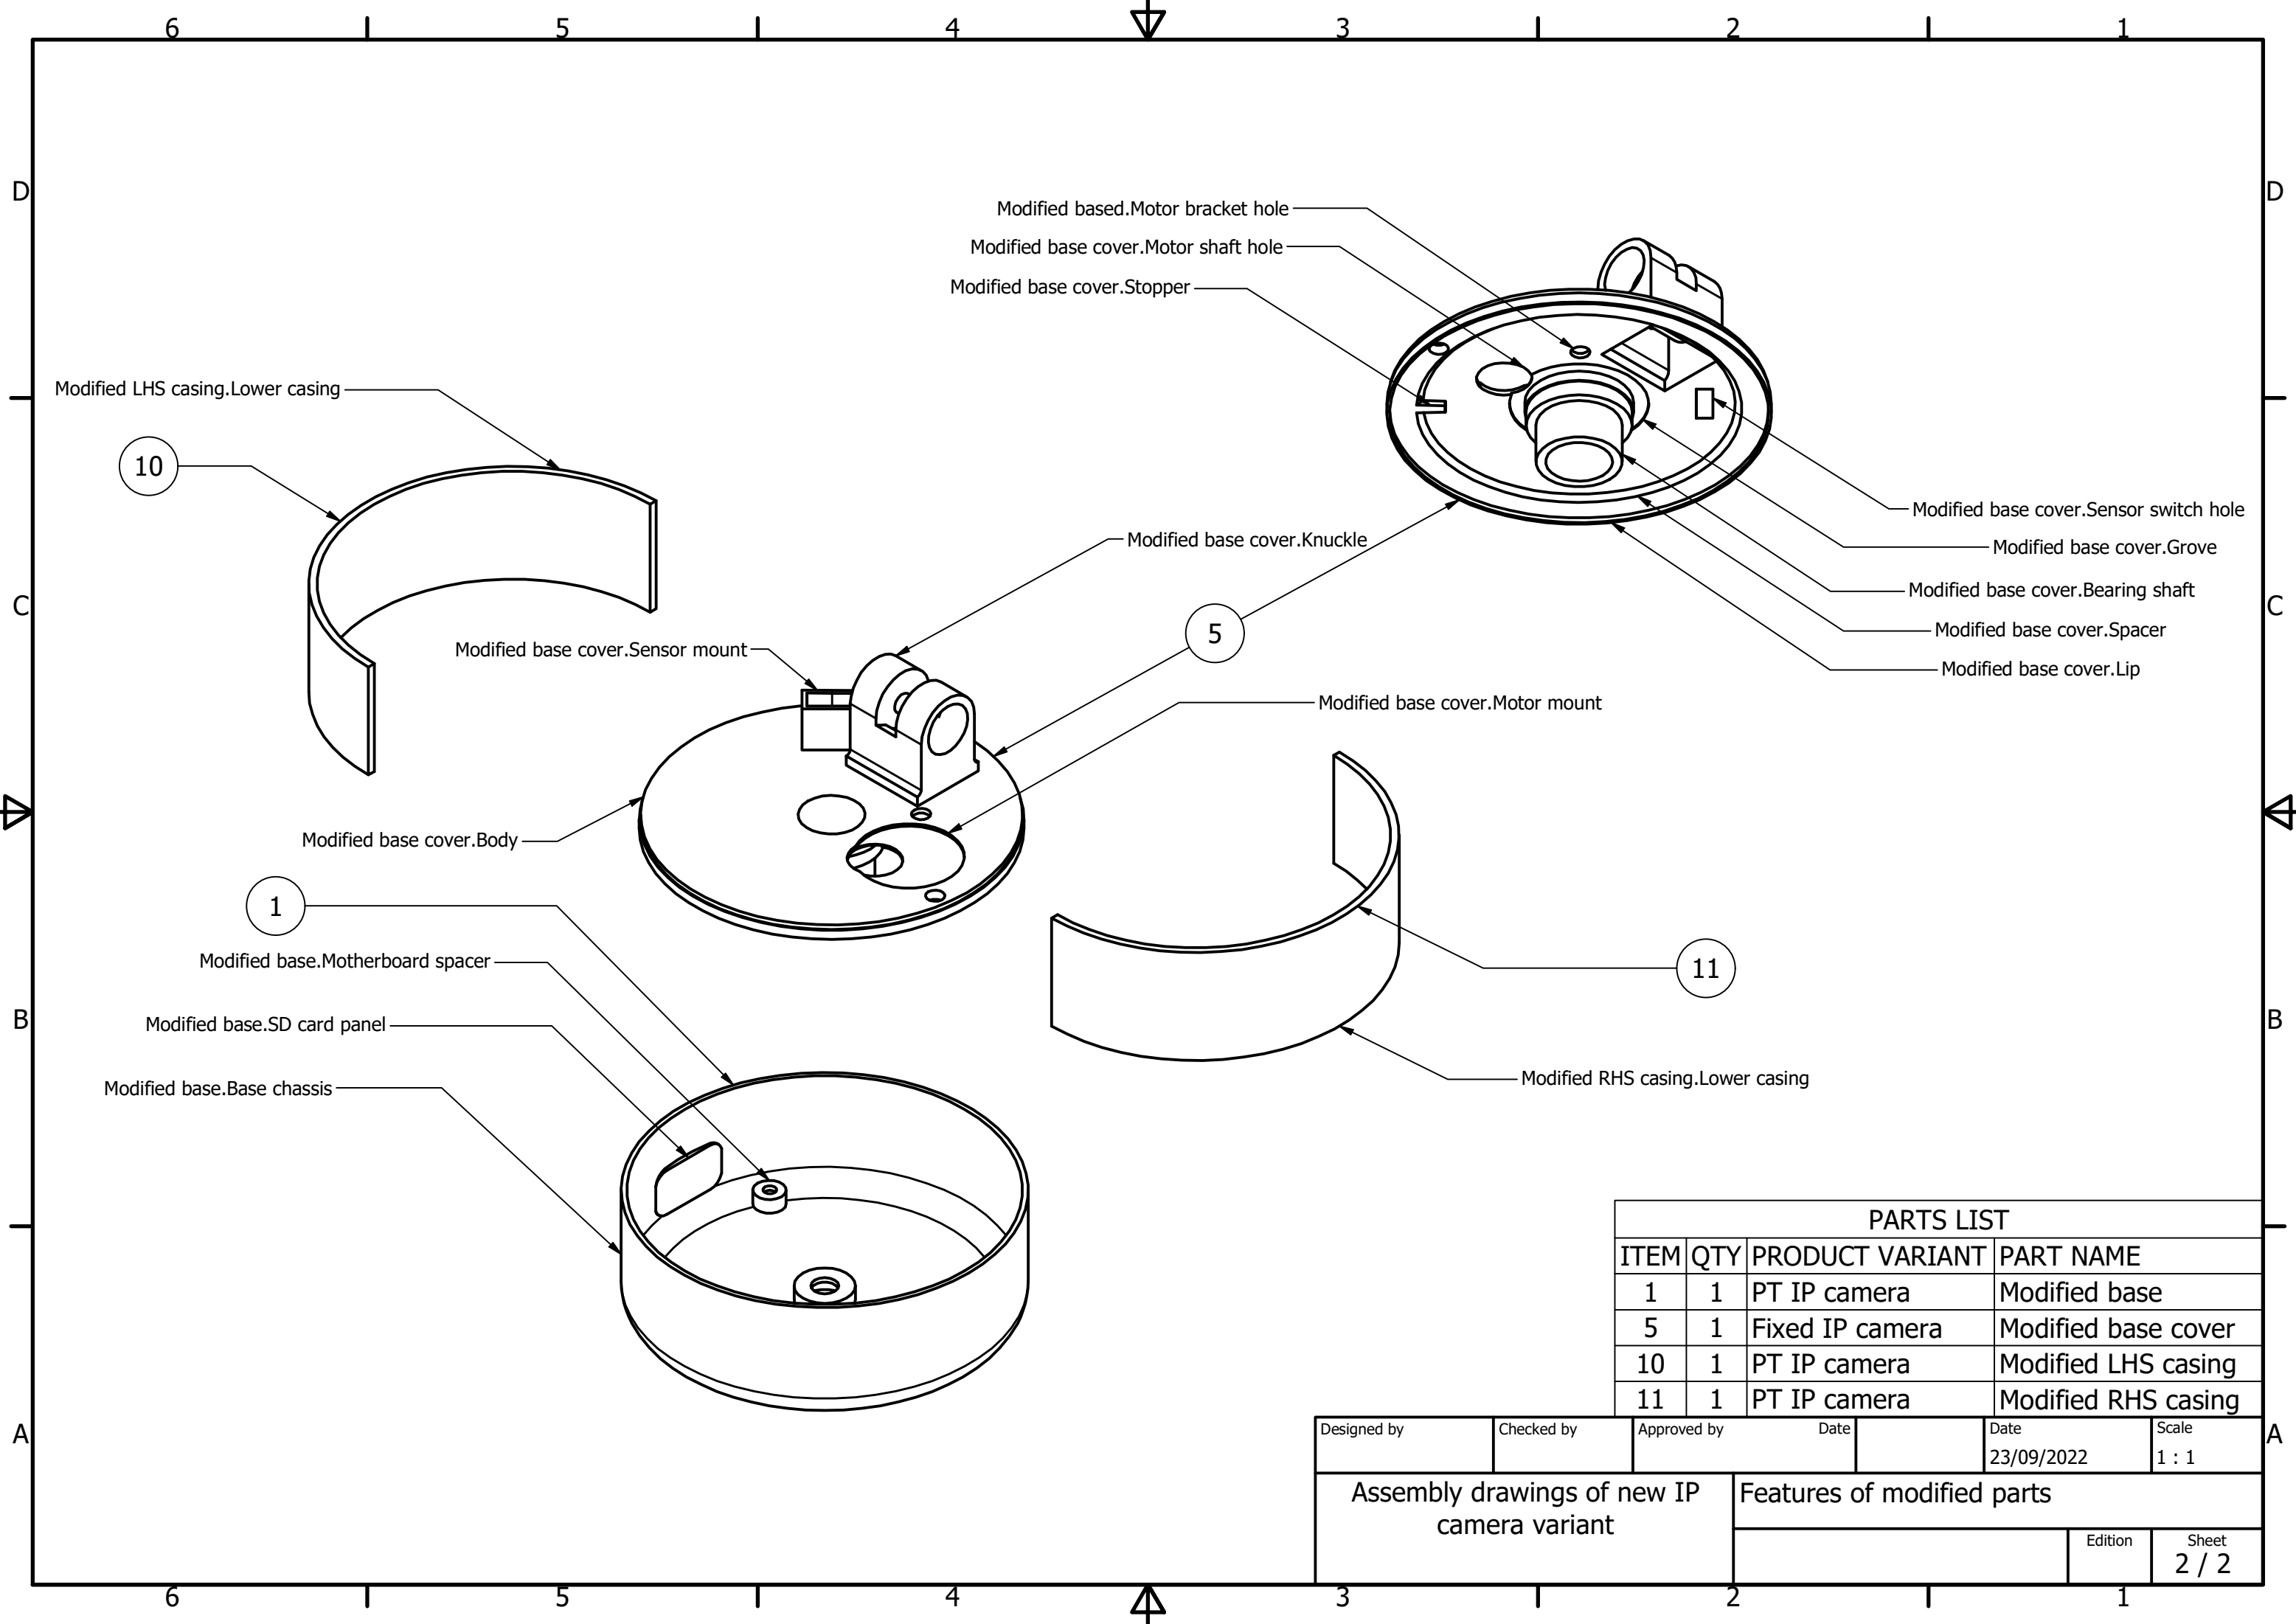

| PARTS LIST |     |                 |                     |
|------------|-----|-----------------|---------------------|
| ITEM       | QTY | PRODUCT VARIANT | PART NAME           |
| 1          | 1   | PT IP camera    | Modified base       |
| 5          | 1   | Fixed IP camera | Modified base cover |
| 10         | 1   | PT IP camera    | Modified LHS casing |
| 11         | 1   | PT IP camera    | Modified RHS casing |

|                                            |            |             |                            |            |       |
|--------------------------------------------|------------|-------------|----------------------------|------------|-------|
| Designed by                                | Checked by | Approved by | Date                       | Date       | Scale |
|                                            |            |             |                            | 23/09/2022 | 1 : 1 |
| Assembly drawings of new IP camera variant |            |             | Features of modified parts |            |       |
|                                            |            |             | Edition                    | Sheet      |       |
|                                            |            |             |                            | 2 / 2      |       |
